# 1 **Wnt/ $\beta$ -catenin inhibition disrupts drug-tolerance in isogenic** 2 **carboplatin-resistant models of Triple-Negative Breast Cancer.**

3 **Willy Antoni Abreu de Oliveira<sup>1†</sup>, Stijn Moens<sup>2†</sup>, Youssef El Laithy<sup>1</sup>, Bernard K. van der**  
4 **Veer<sup>3</sup>, Paraskevi Athanasouli<sup>1</sup>, Emanuela Elsa Cortesi<sup>4</sup>, Maria Francesca Baietti<sup>5</sup>, Kian Peng**  
5 **Koh<sup>3</sup>, Juan-Jose Ventura<sup>4</sup>, Frédéric Amant<sup>2,6</sup>, Daniela Annibali<sup>2,7#</sup>, Frederic Lluís<sup>1#\*</sup>.**

6 <sup>1</sup> KU Leuven, Stem Cell Institute, Department of Development and Regeneration, B-3000 Leuven,  
7 Belgium.

8 <sup>2</sup> KU Leuven, Leuven Cancer Institute (LKI), Department of Oncology, Gynecological Oncology Lab  
9 3000, Leuven, Belgium.

10 <sup>3</sup> KU Leuven, Stem Cell Institute, Department of Development and Regeneration, Laboratory for Stem  
11 Cell and Developmental Epigenetics, B-3000 Leuven, Belgium.

12 <sup>4</sup> KU Leuven, Translational Cell and Tissue Research – Department of Imaging & Pathology, B-3000  
13 Leuven, Belgium.

14 <sup>5</sup> KU Leuven, LKI Leuven Cancer Institute - Trace, Herestraat 49, B-3000 Leuven, Belgium.

15 <sup>6</sup> Centre for Gynecologic Oncology Amsterdam (CGOA), Antoni Van Leeuwenhoek-Netherlands  
16 Cancer Institute (AvL-NKI), University Medical Center (UMC), Amsterdam, The Netherlands.

17 <sup>7</sup> Division of Oncogenomics, The Netherlands Cancer Institute, Amsterdam, The Netherlands.

18 †, These authors have contributed equally to this work.

19 #, Co-last authors.

## 20 **\* Correspondence:**

21 Prof. Frederic Lluís

22 frederic.lluis@kuleuven.be

23 **Keywords: Triple Negative Breast Cancer, WNT Pathway, Carboplatin Resistance, Cancer**  
24 **Stem Cells, PDX models.**

## 25 **Abstract**

26 *Triple-Negative Breast Cancer (TNBC) is the most aggressive breast cancer subtype, characterized by*  
27 *both limited treatment options and higher relapse rates than hormone-receptor-positive breast*  
28 *cancers. Chemotherapy remains the mainstay treatment for TNBC, and platinum salts have been*  
29 *explored as a therapeutic alternative in neo-adjuvant and metastatic settings. However, primary and*  
30 *acquired resistance to chemotherapy in general and platinum-based regimens specifically strongly*  
31 *hampers TNBC management. In this study, we used carboplatin-resistant in vivo patient-derived*  
32 *xenograft and isogenic TNBC cell-line models and detected enhanced Wnt/ $\beta$ -catenin activity*  
33 *correlating with an induced expression of stem cell markers in both resistant models. In accordance,*  
34 *the activation of canonical Wnt signaling in parental TNBC cell lines increases stem cell markers'*  
35 *expression, formation of tumorspheres, and promotes carboplatin resistance. Finally, we prove that*  
36 *Wnt signaling inhibition resensitizes resistant models to carboplatin both in vitro and in vivo,*  
37 *suggesting the synergistic use of Wnt inhibitors and carboplatin as a therapeutic option in TNBC. Here*  
38 *we provide evidence for a prominent role of Wnt signaling in mediating resistance to carboplatin, and*  
39 *we establish that combinatorial targeting of Wnt signaling overcomes carboplatin resistance*  
40 *enhancing chemotherapeutic drug efficacy.*

41

## **Wnt/ $\beta$ -catenin inhibition disrupts drug-tolerance in isogenic carboplatin-resistant models of Triple-Negative Breast Cancer.**

### 42 **1 Introduction**

43 Triple-negative breast cancer (TNBC) is a molecular subtype of breast cancer characterized by the lack  
44 of expression of estrogen-receptor, progesterone-receptor, and human epidermal growth factor receptor  
45 type 2 (1). TNBC accounts for 10-20% of all breast cancer cases, occurring with higher frequency in  
46 younger women, presenting with higher grade and mitotic counts than non-TNBCs, low differentiation,  
47 and frequent lymph node involvement, ultimately contributing to poor prognosis (1,2).

48 The lack of hormone- and growth factor-receptors render chemotherapy the primary systemic treatment  
49 for TNBC. Interestingly, TNBC patients have high response rates to neoadjuvant chemotherapy,  
50 achieving pathological complete response (pCR) more frequently than those bearing non-TNBCs (3).  
51 Nonetheless, TNBC patients experience lower progression-free- and overall survival rates and higher  
52 distant metastatic relapse frequency than non-TNBC patients, highlighting the critical need for  
53 alternative therapeutic approaches(3).

54 The Food and Drugs Administration of the United States of America first approved platinum salts,  
55 namely cisplatin, to treat metastatic testicular cancer, ovarian cancer, and bladder cancer between 1978  
56 and 1979 (4). Since then, the use of platinum-based chemotherapy has grown and is now applied in  
57 many other cancer types. Pre-clinical studies have highlighted that TNBC is particularly sensitive to  
58 DNA damaging agents (5,6). For that reason, platinum salts – DNA-crosslinking agents – have gained  
59 traction as potential additions to the therapeutic toolbox for TNBC. Phase-II and Phase-III clinical trials  
60 have demonstrated the benefits of including carboplatin (CAR) in neoadjuvant regimens for TNBC (7–  
61 10). Importantly, pCR with neoadjuvant treatment is a robust predictor of survival in TNBC (3).  
62 However, chemotherapy-treated TNBC patients are likely to acquire resistance, and patients with  
63 residual disease (RD) have worsened prognosis and experience low survival rates, particularly within  
64 the first three years ensuing treatment (3).

65 During the last decades, our knowledge of platinum's mechanism of action has increased significantly.  
66 Nonetheless, how cancer overcomes platinum-mediated cytotoxicity still holds unanswered questions.  
67 Several studies have shed light on how cancer cells adapt to platinum-based treatment by restoring  
68 DNA damage repair, increasing tolerance to DNA damage, decreasing its intracellular uptake and  
69 accumulation, and regulating apoptosis and autophagy (11). Chemotherapy resistance is also known to  
70 be induced and maintained by adaptations in pro-survival and anti-apoptotic signaling pathways. Like  
71 other chemotherapeutic agents, alterations of such cellular dynamics also affect platinum-based  
72 treatments. Several studies have demonstrated the involvement of NOTCH (12), MEK (13), Hedgehog  
73 (14), EGFR (15), among others, in mediating resistance to platinum in different cancer types. Also,  
74 cancer cells with stem cell-like properties have been described to significantly influence the response  
75 to different chemotherapeutic agents, including platinum compounds (16–19). Cancer stem cells  
76 constitute a subpopulation of cancer cells with tumorigenic and self-renewal capacities and are  
77 considered desirable therapeutic targets since their intrinsic cellular properties contribute extensively  
78 to treatment failure (20–22). Breast cancer stem cells were first isolated in 2003 based on cell surface  
79 markers CD44 and CD24 (23). Since then, many studies have demonstrated their tumorigenic and  
80 drug-resistance capacities, highlighting the need to develop therapeutic approaches that deplete this  
81 population (6,24–26).

82 The Wnt/ $\beta$ -catenin signaling pathway is a developmental signaling cascade with a prominent role in  
83 cancer (27). It is initiated when Wnt ligands (secreted lipid-modified signaling molecules) bind the

## Wnt-inhibition resensitizes carboplatin-resistant TNBC.

84 receptor complex at the cell membrane. A series of events ensues, culminating in the inhibition of  
85 glycogen synthase kinase 3 beta (GSK3 $\beta$ ), and the subsequent cytoplasmic accumulation of  $\beta$ -catenin,  
86 the key mediator protein of Wnt signaling. This accumulation leads to the nuclear translocation of  $\beta$ -  
87 catenin eliciting Wnt target genes' expression by interacting with different transcription factors. In the  
88 absence of Wnt ligands,  $\beta$ -catenin is constitutively phosphorylated by GSK3 $\beta$  and targeted for  
89 proteasomal degradation (28). Notably, Wnt is known to govern several cellular functions with the  
90 potential to contribute to chemotherapy resistance. Such functions include the control and regulation  
91 of proliferation (29), DNA damage repair (30), inhibition of apoptosis (31), and maintenance and  
92 regulation of embryonic, somatic, and cancer stem cell properties (32). Different studies have  
93 demonstrated Wnt pathway involvement in the mediation of platinum resistance in various cancer  
94 types, including squamous cell carcinoma (33,34) and ovarian cancer (35). However, its involvement  
95 in platinum resistance in TNBC is not known.

96  
97 To study how TNBCs acquire resistance to carboplatin treatment, we used a carboplatin-tolerant  
98 isogenic TNBC cell line. Transcriptomic analysis was performed to gain insight into biological  
99 signaling pathways underlying acquired carboplatin resistance *in vitro*, leading to the identification of  
100 Wnt signaling as a candidate resistant-mediating pathway. Additionally, the resistant cell line displayed  
101 enhanced expression of pluripotency markers and stem cell features compared to the parental,  
102 carboplatin-sensitive cells.

103 *In vitro* pharmacological and genetic manipulation of Wnt signaling was employed to assess drug  
104 response alterations and stem cell potential functionally. Inducing Wnt signaling in parental non-  
105 resistant TNBC cell lines elicited the expression of pluripotency markers observed in isogenic resistant  
106 cells and enhanced stem cell features *in vitro*. Moreover, pharmacological and genetic inhibition of  
107 Wnt activity in resistant cells disrupted carboplatin tolerance and hindered tumorsphere formation.  
108 Finally, carboplatin-tolerant isogenic patient-derived xenograft (PDX) models were used to test the  
109 effect of *in vivo* Wnt inhibition on platinum-response. Similar to what we observed *in vitro*, inhibition  
110 of Wnt reduced expression of cancer stem cell markers and drastically reduced tolerance to carboplatin  
111 treatment *in vivo*.

112 Altogether, our results suggest the potential for Wnt signaling inhibition in combination with  
113 carboplatin as a strategy to prevent or overcome platinum resistance in TNBC patients.

## 114 2 Materials and methods

### 115 Cell lines, cell culture, and treatments

116 MDA-MB-468 (ATCC-HTB-132) and MDA-MB-231 (ATCC HTB-26) were maintained in DMEM  
117 high glucose (Gibco 41965039) supplemented with 10% fetal bovine serum, 1mM sodium pyruvate  
118 (Gibco, 11360070), 1X non-essential amino acids (Gibco, 11140035), 100 $\mu$ g/mL penicillin-  
119 streptomycin (Gibco, 15140163) and 0.01mM 2-mercaptoethanol (Gibco, 31350010).

120 Unless otherwise specified in the text, all carboplatin treatments (CAR, Hospira UK, Ltd) were done  
121 at 2 $\mu$ M for MDA-MB-468 cells and 35 $\mu$ M for MDA-MB-231 cells. Small molecule Wnt activator  
122 CHIR99021 (CHIR, Sigma, SML1046) was administered to cells in DMSO (Sigma, D2650) at 4 $\mu$ M.  
123 Small molecule Wnt inhibitor LGK-974 (LGK, Selleckchem, S7143) was, unless otherwise specified,  
124 administered at 200 nM in DMSO.

## **Wnt/ $\beta$ -catenin inhibition disrupts drug-tolerance in isogenic carboplatin-resistant models of Triple-Negative Breast Cancer.**

125 Carboplatin resistance was induced in MDA-MB-468 cells by continued maintenance in carboplatin  
126 containing medium, starting at a concentration of 0.4  $\mu$ M. The concentration of carboplatin was  
127 increased in 9 increments until reaching 2  $\mu$ M, once unhindered cell growth was obtained at each  
128 concentration level, allowing a 48h carboplatin-free recovery period with each splitting (35).

### **129 Lentiviral particle production and transduction**

130 Lentiviruses were produced according to the RNAi Consortium (TRC) protocol available from the  
131 Broad Institute (<https://portals.broadinstitute.org/gpp/public/resources/protocols>). In brief,  $5 \times 10^5$   
132 HEK293T cells seeded per well in 6-well plates and transfected the following day with 750  $\mu$ g pCMV-  
133 dR8.91, 250  $\mu$ g pCMV-VSV-G, and 1  $\mu$ g of the specific lentiviral expression or silencing constructs  
134 using FugeneHD (Promega, E2311) in Opti-MEM (Gibco, 31985070). One day after, the culture  
135 medium was replaced. The same day, lentivirus-recipient cells were plated in 6-well plates at a density  
136 of  $5 \times 10^4$  cells per well. Lentivirus-containing medium was collected from HEK293T cells 48h and 72h  
137 after transfection and added to recipient cancer cells after being filtered. Two days after infection, cells  
138 were washed thoroughly with PBS, medium refreshed, and appropriate selection antibiotics applied.

139 For overexpression of  $\Delta$ N90- $\beta$ -Catenin, we used pLV-beta-catenin  $\Delta$ N90 (Addgene, #36985) and  
140 pPRIME-CMV-NEO-recipient (CTRL, Addgene, #11659). For  $\beta$ -Catenin shRNA mediated silencing,  
141 we used pXL002-ishRNA-beta-catenin-1 (Addgene, #36297) and pXL004-ishRNA-scramble  
142 (Addgene, #36311). For Wnt fluorescent reporter assay, we used 7TGP (Addgene, #24305).

### **143 In vitro carboplatin response (IC50)**

144 For IC50 experiments, we seeded  $2.5 \times 10^4$  cells per well in 12-well plates. Cells were treated with  
145 increasing concentrations of CAR (0.02 to 200  $\mu$ M for MDA-MB-468 and 0.35 to 3500  $\mu$ M for MDA-  
146 MB-231) for 72 hours. Viability was assessed by manual cell counting using a Neubauer  
147 hemocytometer using trypan blue for dead cell exclusion. Cell viability was determined as a percentage  
148 of untreated cells, and non-linear regressions of [CAR] vs. normalized-response were fitted using  
149 GraphPad Prism v.8.0.1. to mathematically determine the IC50.

### **150 Flow Cytometry**

151 For annexin V apoptosis analysis, cells were detached and resuspended in annexin V binding buffer  
152 (BD Pharmigen, 51-66121E) and incubated for 15 minutes at room temperature with APC-conjugated  
153 Annexin V (Thermo-eBioscience, BMS306APC-100). After incubation, cells were diluted in binding  
154 buffer containing 100 nM of 4',6-diamidino-2-phenylindole (DAPI). Unstained and single-stained  
155 (annexin V and DAPI) were used as gating controls.

156 For ALDH activity assays, cells were detached, washed in PBS, and stained using the AldeRed ALDH  
157 detection assay kit (Merck SRC150) according to manufacturer specifications.

158 For immunolabeling of CD44 and CD24, cells were detached, washed twice in PBS with 4% FBS, and  
159 incubated with CD44-PE (BD Pharmigen, 555479) and CD24-APC (Invitrogen, 17-4714-81)  
160 antibodies according to manufacturer specifications at room temperature. After incubations, cells were  
161 washed twice in PBS with FBS and resuspended in PBS containing 4% FBS and 100 nM of DAPI.  
162 Cells incubated with PE- and APC- conjugated isotype-antibodies and single-stained cells were used  
163 as gating controls.

## **Wnt-inhibition resensitizes carboplatin-resistant TNBC.**

164 All data were collected on a BD FACS Canto II at the KU Leuven Flow Cytometry Core and analyzed  
165 using FlowJo v.10.6.2.

### **166 SDS-PAGE and Western Blot**

167 For western blot, cells were collected and washed in PBS before being pelleted. Then, cells were lysed  
168 on ice with RIPA buffer (150 mM NaCl, 1% Nonidet P40, 0.5% sodium deoxycholate, 0.1% dodecyl  
169 sulfate, 50 mM Tris-HCL, pH 8.0) containing a cocktail of protease and phosphatase inhibitors (Sigma,  
170 #P5726, #P0044, #P8340). Lysates were centrifuged at 16.000x g for 10 minutes at 4°C to discard  
171 insoluble material, and protein concentration was determined using the Bradford method. For SDS-  
172 PAGE, 30 µg of protein were mixed with 4x Laemmli buffer (240 mM Tris/HCL pH 6.8, 8% SDS,  
173 0.04% bromophenol blue, 5% 2-mercaptoethanol, 40% glycerol) and denatured for 5 minutes at 96°C  
174 prior to electrophoretic protein separation. Resolved protein extracts were transferred to PVDF  
175 membranes (BIORAD, 162-0177). Transfer success was assessed with Ponceau S solution, and  
176 membranes were blocked with 5% non-fat milk or 5% BSA in TBS-T (0.1% Tween-20<sup>®</sup>) for 60  
177 minutes. After blocking, membranes were incubated with primary antibodies at 4°C overnight. The day  
178 after, membranes were washed 3 times with PBS-T for 10 minutes and incubated with secondary HRP-  
179 conjugated antibodies. Immunolabeled proteins were detected with Supersignal West Pico  
180 chemiluminescent kit (Fisher Scientific, 34077) on autoradiography film (Santa Cruz, SC-201697).  
181 The primary antibodies used were active rabbit anti-non-phosphorylated β-Catenin (CellSignaling  
182 Technologies, #19807S), mouse anti-total β-Catenin (BD, #610154), mouse anti-β-actin (Santa Cruz,  
183 #47778).

### **184 Next-generation mRNA Sequencing**

185 For mRNA sequencing, total RNA was obtained from cells using the GenElute mammalian total RNA  
186 miniprep kit (Sigma, RTN350-1KT). Libraries were prepared from 250 ng of total RNA using the  
187 KAPA stranded mRNA-seq kit (Roche, KK8421) according to the manufacturer's specifications.  
188 KAPA-single index adapters (Roche, KK8700) were added to A-tailed cDNA, and libraries were  
189 amplified by 12 cycles of PCR. Finally, libraries were purified on Agencourt AMPure XP beads  
190 (Beckman Coulter, A63881). Libraries were controlled for fragment size using the High Sensitivity  
191 DNA analysis kit (Agilent, 5067-4626) on an Agilent Bioanalyzer 2100. Each library was diluted to 4  
192 nM and pooled for single-end 50-bp sequencing on an Illumina Hiseq4000 20 – 27 million reads per  
193 sample (22 million reads on average).

194 Adapters, polyA tails, and bad quality reads (Phred score > 20) were trimmed using Trim Galore!  
195 (v0.6.4\_dev) with default parameters. Reads were aligned to the transcriptome and quantified using  
196 Salmon (v0.14.1) (36) with default parameters using GENCODE release 36 of the human reference  
197 transcriptome sequences and the comprehensive gene annotation. Subsequently, the counts were  
198 imported into R (v4.0.2) using tximport (v1.18.0) and differentially expressed genes were defined using  
199 DEseq2 (v1.30.0) (37) and log fold changes corrected using “ashr” method (38) (FDR adjusted p.val  
200 < 0.05 & |log<sub>2</sub>(fold change)| > 1.5). TPM values were also calculated using tximport.

201

### **202 Functional enrichment analysis and enrichment maps**

203 Datasets GSE103668 and E-MTAB-7083 were downloaded from the GeneExpression Omnibus and  
204 ArrayExpress public repositories, respectively. Differentially expressed genes with |log<sub>2</sub>(fold-

## **Wnt/ $\beta$ -catenin inhibition disrupts drug-tolerance in isogenic carboplatin-resistant models of Triple-Negative Breast Cancer.**

205 change)| >1 and p-value < 0.05 were obtained using limma (v3.26.8) R package in R (v4.02) and by  
206 using the limma method on NetworkAnalyst (39). Differentially expressed genes were ranked by fold-  
207 change for Gene Set Enrichment Analysis (GSEA v4.1.0) using weighted enrichment statistic and  
208 KEGG, Hallmarks, and Wikipathways gene sets. Additionally, we used custom gene sets comprised  
209 of human embryonic stem cell-related genes (M1871: BENPORATH\_ES1 and M4241:  
210 BENPORATH\_ES2), pluripotency transcription factor target genes (M14573:  
211 BENPORATH\_NOS\_TARGETS), and cancer progenitor genes  
212 (ENGELMANN\_CANCER\_PROGENITORS\_UP) obtained from [www.gsea-msigdb.org](http://www.gsea-msigdb.org). The  
213 statistical significance threshold was set at  $FDR < 0,1$  or ( $p < 0,5 \wedge FDR < 0,25$ ). Additionally, gProfiler  
214 (<https://biit.cs.ut.ee/gprofiler/gost>) was used to assess the function of ranked DEGs using the ranked  
215 query mode and Benjamini-Hochberg FDR thresholding. The outputs of GSEA and gProfiler analysis  
216 were fed to the EnrichmentMap app on Cytoscape (v3.8.1) to generate visualizations of enriched  
217 biological features and pathways following published protocols (40). Differentially expressed genes  
218 from RNA-sequencing were processed for functional analysis and visualization in the same way,  
219 except for GSEA, differentially expressed genes were ranked by the absolute value of fold change (41).

### **220 Real-Time Quantitative Polymerase Chain Reaction and gene expression analysis**

221 For RT-qPCR, total RNA was extracted using the GenElute mammalian total RNA miniprep kit from  
222 Sigma (Sigma, RTN350-1KT) according to the manufacturer's instructions, and DNA was digested  
223 during RNA extraction using on-column DNase (Sigma, On-Column DNase I digestion set,  
224 DNASE70). cDNA was synthesized from 500 ng of total RNA using the BIORAD iScript cDNA  
225 synthesis kit (BIORAD, CAT#1708891). Quantitative real-time PCR reactions were set up in technical  
226 triplicates with Platinum SYBR Green qPCR SuperMix-UDG (Invitrogen, 11733-046) on a ViiA7  
227 Real-Time PCR System (Thermo Scientific). Expression levels were normalized to housekeeping  
228 genes (HKG) GAPDH and RPL19. Statistical testing of differences in expression between samples  
229 was carried out on relative-expression values ( $2^{-\Delta CT}$ ). In some figures, mRNA expression values are  
230 represented as fold-change for convenience of interpretation, although statistical testing was performed  
231 on relative expression values ( $2^{-\Delta CT}$ ).

### **232 Tumorsphere formation assays**

233 For tumorsphere formation assays, cells were collected as described above, washed, counted, and  
234 resuspended in serum-free tumorsphere assay medium containing DMEM/F12, 1x B27 (Thermo,  
235 12587010), 10ng/mL bFGF, (Peprotech, 100-18b) 20 ng/mL EGF (Peprotech, AF-100-15), and 2%  
236 growth-factor reduced matrigel (Corning, 734-0268). Cells were seeded at a density of 1000 cells/mL  
237 in ultra-low attachment 6-well plates and allowed seven days to grow. On the 7<sup>th</sup> day, spheres were  
238 collected and centrifuged at 50g for 10 minutes, resuspended, and transferred to 96-well plates. Plates  
239 were briefly centrifuged at 50g for 1 minute to pull down larger spheroids (>60  $\mu$ m) which were  
240 counted using a tally counter.

### **241 Immunohistochemistry**

242 Tumor samples were dissected, washed in saline, and either snap-frozen in OCT compound (VWR  
243 361603E) or fixed in 4% formalin for 24 hours. Frozen tissue was cut at 10  $\mu$ m thickness using a  
244 cryostat and mounted on superfrost microscope slides (Thermo Scientific, J1800AMNZ). Formalin-  
245 fixed tissue was embedded in paraffin and sectioned at 4  $\mu$ m thickness using a microtome. Frozen and

## **Wnt-inhibition resensitizes carboplatin-resistant TNBC.**

246 FFPE sections were stained with hematoxylin and eosin (HE), using a Leica Autostainer XL (Leica  
247 Microsystems), or stained in immunohistochemistry (IHC). In brief, frozen sections were fixed in  
248 acetone and preserved at -80°C until use. Slides were thawed at room temperature for 15 minutes and  
249 rehydrated in PBS. FFPE sections were deparaffinized in Leica Autostainer XL (Leica Microsystems)  
250 and pre-treated in citrate buffer (EnVision FLEX Target Retrieval Solution Low pH, Agilent-Dako,  
251 K8005) using a PT Link module (Dako), according to manufacturer's instructions. For IHC, tumor  
252 sections were incubated with Envision Flex Peroxidase-Blocking Reagent (Dako, S202386-2) for at  
253 least 5 minutes, rinsed three times in wash buffer (Dako, K800721-2), and blocked with 5% bovine  
254 serum albumin (BSA) for 45 min at room temperature. After overnight incubation with anti-human  
255 Ki67 antibody (Abcam, EPR3610 clone, 1:1500) at 4°C, slides were incubated with HRP-conjugated  
256 secondary antibodies (Agilent, K400311-2) for 30 min. Tissue sections were stained with 3,3'-  
257 diaminobenzidine solution (DAB; Liquid DAB+ Substrate Chromogen System, K346889-2, Dako),  
258 counterstained with hematoxylin, and mounted using an automated coverslipper machine (Leica  
259 CV5030, Leica Biosystems). Pictures were acquired using a Zeiss Axiovision microscope.  
260 Quantification of Ki67+ cells was performed in at least 5 random 20x fields per sample using QuPath  
261 0.2.3. (42).

### **262 TUNEL Staining and pan-cytokeratin immunofluorescent staining.**

263 For TUNEL staining, cryopreserved tumor samples were cryosectioned at 10 µM thick and mounted  
264 on superfrost microscope slides. Slides were stored at -80°C and stained using the Click-iT Plus  
265 TUNEL (ThermoFisher C10617) according to the manufacturer's instructions. After TUNEL staining,  
266 slides were blocked with 5% normal donkey serum in PBS (Gibco, 10010-050) for one hour and  
267 incubated overnight at 4°C with rabbit anti-pan-cytokeratin polyclonal antibody (Abcam ab217916  
268 1:400). The following day, slides were washed three times in PBS containing 0.01% Triton X-100 and  
269 incubated for 2 hours with AlexaFluor conjugated donkey anti-rabbit secondary antibody (Abcam  
270 ab150073 1:1000). After secondary antibody incubation, slides were washed three times with PBS  
271 containing 0.01% Triton X-100 and mounted with ProLong™ Gold Antifade Mountant with DAPI  
272 (P36931, Thermo Fisher Scientific). Images were acquired using a Leica Sp8x confocal microscope.  
273 Quantification of TUNEL positive/ pan-cytokeratin positive cells was done in at least eight randomly  
274 sampled 10x fields per sample using QuPath 0.2.3.

### **275 PDX models**

276 BRC016 (primary, grade III, TNBC) was established at the University Hospital UZ Leuven and is  
277 available from the Trace Leuven Cancer Institute (<https://www.uzleuven-kuleuven.be/lki/trace/trace-leuven-pdx-platform>). C4O was previously obtained from a carboplatin treatment-refractory BRC016  
278 tumor. The regrown tumor was harvested and implanted on NMRI-Fox1nu nude mice (Taconic) for  
279 propagation, re-testing, and confirmation of carboplatin tolerance in a previously published study (35).  
280 Treatment experiments included 24 NMRI-Fox1nu nude mice implanted with C4O tumor fragments.  
281 When tumors reached a volume of approximately 300 mm<sup>3</sup>, mice were randomly assigned to placebo  
282 (vehicle), CAR (50 mg/kg), LGK (2 mg/kg), or CAR+LGK (50 mg/kg + 2 mg/kg) treatment groups.  
283 Carboplatin was administered once a week intraperitoneally, and LGK974 was administered daily by  
284 oral gavage. Treatments were carried out for three weeks. Tumors were measured every 48 hours with  
285 digital calipers, and volume was estimated as  $V = L \times W^2 \times \pi/6$  (L: length, W: width).  
286

### **287 Statistical analysis**

## **Wnt/ $\beta$ -catenin inhibition disrupts drug-tolerance in isogenic carboplatin-resistant models of Triple-Negative Breast Cancer.**

288 All data were analyzed using GraphPad Prism 8, except for transcriptomic datasets. Unless otherwise  
289 specified, comparisons between two groups were tested for statistical significance using unpaired t-  
290 tests with Welch correction. Comparisons between multiple groups were performed using a one-way  
291 analysis of variance (ANOVA). Comparisons between multiple groups across multiple time points  
292 were performed using two-way ANOVA. All statistical testing was corrected for multiple comparisons,  
293 using the Holm-Sidak method when comparing samples based on experimental design or the Tukey  
294 method when testing the comparison between all means in a dataset. For the reader's convenience, all  
295 statistical tests and sample sizes are indicated in the figure legends.

### 296 **3 Results**

#### 297 **Carboplatin-tolerant TNBC cells are characterized by enhanced WNT/ $\beta$ -catenin pathway** 298 **activity, stem cell marker expression, and tumorsphere formation capacity.**

299 To explore the mechanisms of *in vitro* carboplatin resistance in TNBC, we generated an isogenic  
300 carboplatin-tolerant cell line (468'CT) (Fig. 1A) by exposing MDA-MB-468 cells to carboplatin  
301 treatment in incremental cycles.

302 Half-maximal inhibitory concentration (IC<sub>50</sub>) profiles for carboplatin were determined for both  
303 parental (468'P) and 468'CT cells (Fig. 1B). The carboplatin-tolerant cell line displayed a 5x increase  
304 in IC<sub>50</sub>, thereby functionally confirming a significant increase in carboplatin tolerance. Flow-  
305 cytometric analysis of apoptosis further corroborated the establishment of the carboplatin-tolerant  
306 phenotype. When exposed to 2 $\mu$ M for 72 hours, 468'P stained positively and significantly for the  
307 apoptosis marker annexin V (43), whereas no significant increase in apoptotic cells was observed in  
308 468'CT (Fig. 1C).

309 To study the underlying mechanisms of carboplatin tolerance, we performed transcriptome analysis by  
310 next-generation mRNA sequencing in 468'P and 468'CT cells. We used the ranked differentially  
311 expressed genes (Supplementary Table 1) followed by one-tailed Gene Set Enrichment Analysis  
312 (GSEA) (41) to identify changes in signaling pathways (Hallmarks, KEGG and Wikipathways). GSEA  
313 analysis identified alterations in several key cancer-related processes such as epithelial-mesenchymal-  
314 transition (Hallmarks) and PPAR and P53 signaling (KEGG) (Supplementary Table 1). However, Wnt  
315 signaling was consistently enriched across the two databases (Fig. 1D) with a clear differential  
316 expression pattern across the two cell lines (Supplementary Fig. 1A). Moreover, enrichment maps of  
317 Wikipathway database terms highlighted a cluster of gene sets comprising Wnt signaling and  
318 pluripotency regulation (Fig. 1E), suggesting a potential acquisition or enrichment of stem cell features  
319 in carboplatin tolerant cells.

320 To further understand the differences in stem cell transcriptional features between 468'CT and  
321 468'P cells, we compared our transcriptomic data with a curated gene sets comprised of genes found  
322 overexpressed in human embryonic stem cells (hESC) and cancer stem cells (26,44). Interestingly,  
323 468'CT seem to be transcriptionally closer to both embryonic and cancer stem cells than 468'P as  
324 determined by GSEA (Fig. 1F). In addition, we compared our transcriptomic data with a gene set  
325 comprised of targets of pluripotency transcription factors NANOG, OCT4, and SOX2 in hESCs  
326 determined by chromatin immunoprecipitation followed by DNA sequencing (26). GSEA revealed  
327 enrichment of pluripotency transcription factor target genes in 468'CT cells, lending further support to  
328 the putative acquisition of stem cell features in this cell line (Fig. 1G).



## **Wnt-inhibition resensitizes carboplatin-resistant TNBC.**

329 To functionally validate the observed differences in Wnt/ $\beta$ -catenin signaling between 468'CT and  
330 468'P cells, we analyzed protein levels of non-phosphorylated (active)  $\beta$ -catenin. Importantly, western-  
331 blot analysis of total protein extracts in baseline untreated conditions revealed strong enrichment of  
332 active  $\beta$ -catenin in 468'CT cells compared to the parental counterpart, thereby confirming the  
333 functional activation of Wnt activity in drug-tolerant cells (Fig. 1H). Moreover, the accumulation of  
334 active  $\beta$ -catenin was accompanied by transcriptional activation of Wnt-reporter activity  
335 (Supplementary Fig. 1B).

336 To quantify differences in frequency of putative cancer stem cell populations in both cell lines, we used  
337 flow cytometry to assess the enzymatic activity of aldehyde dehydrogenases (ALDH) and the  
338 expression level of the cell surface markers CD44 and CD24. Both methods have been used to identify,  
339 quantify, and isolate putative cancer stem cells from different cancer types. High ALDH activity and  
340 CD44/CD24 expression ratio in TNBC have been shown to correlate with enhanced tumorigenesis and  
341 metastatic potential as well as radio- and chemotherapy resistance (23,25,45). Flow cytometric  
342 analysis showed significant differences in ALDH positive (Fig. 1I) and CD44<sup>+</sup>/CD24<sup>-</sup> cells (Fig. 1J),  
343 with 468'CT cells expressing higher levels of both markers. Gene expression analysis also revealed an  
344 enrichment of the core pluripotency regulators *OCT4*, *NANOG*, and *cMYC*, as well as cancer stem cell  
345 marker *LGR5* (46) (Fig. 1K).

346 To functionally evaluate differences in cancer stem cell properties and *in vitro* tumor-initiating  
347 capacity, we performed a tumorsphere formation assay. *In vitro* growth in non-adherent conditions has  
348 been described as an exclusive capability of cancer stem cells, thereby functioning as a surrogate  
349 measure of *in vitro* tumor-initiating capacity and as a method to enrich cancer stem cells (47).  
350 Importantly, in line with our stemness-related gene expression data and flow cytometry analysis of  
351 ALDH activity and CD44/CD24 expression, we observed a significantly higher tumorsphere formation  
352 frequency in 468'CT cells compared to 468'P (Fig. 1L).

353 Altogether, the transcriptomic evidence for alterations in Wnt signaling, and presumably stem cell  
354 features, between 468'CT and 468'P cells suggests the possibility of its involvement in mediating  
355 tolerance in our carboplatin-resistant cell line.

## **356 Pharmacological activation of Wnt signaling in wild-type cells disrupts carboplatin-response and 357 enhances stemness and pluripotency marker expression.**

358 We hypothesized that modulation of Wnt signaling in the parental 468'P cell line could recapitulate the  
359 carboplatin-tolerant phenotype and increase the expression level of pluripotency and stem cell-related  
360 genes. To test this hypothesis, we treated 468'P with a small molecule inhibitor of GSK3 $\beta$ , CHIR99021  
361 (CHIR), thereby preventing  $\beta$ -catenin degradation and consequently activating the Wnt/ $\beta$ -catenin  
362 pathway. To confirm Wnt signaling activation, we used a lentiviral fluorescent reporter of canonical  
363 Wnt transcriptional activity (TOPGFP) (48). 468'P displayed low basal levels of Wnt-reporter activity  
364 but promptly induced the reporter upon GSK3 $\beta$  inhibition, with almost 100% of cells becoming GFP  
365 positive within 12 hours of treatment (Fig. 2A).

366 We observed a significant rescue of survival when treating 468'P with CHIR combined with  
367 carboplatin (Fig. 2B). Carboplatin-induced apoptosis was also significantly reduced when cells were  
368 co-treated with CHIR and CAR, as determined by flow cytometric analysis of Annexin V positivity  
369 (Fig. 2C). Also, GSK3 $\beta$  inhibition led to the upregulation of *OCT4* and *NANOG* pluripotency markers  
370 (Fig. 2D).

## Wnt/ $\beta$ -catenin inhibition disrupts drug-tolerance in isogenic carboplatin-resistant models of Triple-Negative Breast Cancer.

371 Similar results were observed by inhibiting GSK3 $\beta$  on a second TNBC cell line (MDA-MB-231)  
372 (Supplementary Fig.2 A-B), suggesting this effect is not cell line-specific.

### 373 $\beta$ -catenin overexpression induces carboplatin tolerance in 468'P and enhances stem cell features.

374 GSK3 $\beta$  is a multi-substrate serine-threonine kinase that regulates a multitude of signaling pathways  
375 (49). As such, we proceeded to investigate whether the effects of pharmacological activation of Wnt  
376 signaling on stemness and carboplatin tolerance could also be induced by direct overexpression of  $\beta$ -  
377 catenin. To achieve this, we transduced 468'P cells with a lentiviral vector encoding a truncated,  
378 constitutively active mutant  $\beta$ -catenin ( $\Delta$ n90  $\beta$ -catenin) (50), generating  $\beta$ -catenin overexpressing cells  
379 (468'OE) (Fig. 3A).

380 We then performed mRNA-sequencing to investigate biological processes altered by overexpression  
381 of  $\beta$ -catenin in TNBC cells. Differentially expressed genes (Supplementary Table 2) were ranked by  
382 fold-change and analyzed by GSEA using the Wikipathways database. We detected an interesting  
383 enrichment of gene sets related to both pluripotency and differentiation, namely Embryonic Stem Cell  
384 Pluripotency Pathways (M39530: WP\_ESC\_PLURIPOTENCY\_PATHWAY) and Wnt signaling in  
385 pluripotency (M39387: WP\_WNT\_SIGNALING\_PATHWAY\_AND\_PLURIPOTENCY) (Fig. 3B).  
386 In addition, GSEA revealed a significant correlation between the transcriptional profile of 468'OE cells  
387 and hESC and pluripotency transcription factor gene sets (Supplementary Fig. 3A).

388 468'OE displayed increased carboplatin tolerance in comparison with 468'CTRL cells (empty lentiviral  
389 vector) (IC<sub>50</sub> 468'OE:  $\sim$ 7 $\mu$ M vs. IC<sub>50</sub> 468'CTRL:  $\sim$ 1,5 $\mu$ M) (Fig. 3C). Accordingly, flow cytometric  
390 analysis revealed that upon overexpression of active  $\beta$ -catenin, 468'OE cells fail to induce apoptosis  
391 when challenged with carboplatin, displaying Annexin V positivity frequencies at the same level of  
392 untreated cells (Fig. 3D). These data confirm the direct involvement of  $\beta$ -catenin in the acquisition of  
393 *in vitro* carboplatin tolerance in TNBC.

394 Next, we probed gene expression of Wnt targets and pluripotency and cancer stem cell markers by RT-  
395 qPCR. As observed with pharmacological activation of Wnt,  $\beta$ -catenin overexpression also induced a  
396 significant upregulation of pluripotency markers *OCT4* and *NANOG* but also *cMYC* and *LGR5* (Fig.  
397 3E).

398 Further, in accordance with the increased expression of pluripotency and stemness-related genes, flow  
399 cytometric analysis of ALDH activity (Fig. 3F) and CD44/CD24 expression (Fig. 3G) corroborated  
400 the presumptive induction of an enhanced cancer stem cell phenotype upon overexpression of  $\beta$ -catenin  
401 in TNBC cells.

402 Finally, we investigated whether overexpression of  $\beta$ -catenin functionally endows TNBC cells with  
403 enhanced tumorsphere formation capacity. Indeed, 468'OE cells displayed a significantly higher  
404 sphere-forming efficiency when grown in 3D suspension culture conditions, confirming that  $\beta$ -catenin  
405 overexpression functionally enhances *in vitro* stem cell properties in TNBC cell lines (Fig. 3H).

406 The overexpression of  $\Delta$ n90  $\beta$ -catenin on MDA-MB-231 cells yielded the same effect with a roughly  
407 10-fold increase in the IC<sub>50</sub> of carboplatin, as well as increased ALDH activity and tumorsphere  
408 formation capacity (Supplementary Fig. 3 B-F).

## **Wnt-inhibition resensitizes carboplatin-resistant TNBC.**

### **409 WNT inhibition disrupts carboplatin tolerance in 468'CT cells and downregulates cancer stem 410 cell and pluripotency marker expression.**

411 Wnt signaling is deregulated in 468'CT cells, and  $\beta$ -catenin overexpression on parental cells confirmed  
412 its role in mediating the carboplatin-tolerant stem-like phenotype. Given these observations, we  
413 hypothesized that inhibition of Wnt signaling could restore sensitivity in 468'CT cells. To that end, we  
414 used LGK974 (LGK), a small molecule inhibitor of the endoplasmic reticulum palmitoyltransferase  
415 porcupine (PORCN). This enzyme is responsible for processing Wnt ligands for secretion, therefore  
416 mediating a crucial step of Wnt-dependent signaling (51).

417 Combinatorial treatment of 468'CT cells with 2  $\mu$ M of CAR and LGK increased carboplatin-sensitivity  
418 in a dose-dependent manner (Fig. 4A). Interestingly, LGK treatment alone (200nM) was insufficient  
419 to induce apoptosis in both 468'CT and 468'P. However, when added to carboplatin, LGK974 induced  
420 strong annexin V positivity in 468'CT cells, indicating a rescue of carboplatin sensitivity in the tolerant  
421 cell line (Fig. 4B).

422 Gene expression analysis by qPCR of LGK974-treated 468'CT cells confirmed downregulation of Wnt  
423 signaling by reduced expression of WNT target *AXIN2*. More importantly, LGK974 severely reduced  
424 transcript levels of pluripotency markers *OCT4*, *NANOG*, and *cMYC* both in the presence or absence  
425 of carboplatin (Fig. 4C). These results corroborate the hypothesis that Wnt primes TNBC cells for  
426 carboplatin resistance by maintaining a stem-cell-like phenotype.

### **427 Inducible $\beta$ -catenin knockdown resensitizes 468'CT cells to carboplatin and disrupts expression 428 of stem cell markers and tumorsphere formation capacity.**

429 Next, we investigated whether cancer stem cell markers and function could be manipulated by directly  
430 disrupting  $\beta$ -catenin making use of doxycycline (DOX) inducible short-hairpin RNA targeting  
431 *CTNNB1* ( $\beta$ -catenin) transcripts in 468'CT cells (iCTNNB1-KD) (52).

432 Gene expression analysis by RT-qPCR confirmed a reduction of roughly 90% in *CTNNB1* transcripts  
433 upon DOX treatment of iCTNNB1-KD cells whereas, as expected, cells expressing inducible  
434 scrambled shRNA (iSCRMBl) maintained basal  $\beta$ -catenin transcript levels (Fig. 5A). Notably, DOX-  
435 induced  $\beta$ -catenin knockdown led to a robust reduction of pluripotency and cancer stem cell markers,  
436 confirming the role of  $\beta$ -catenin in maintaining their high expression (Fig. 5A).

437 Next, we investigated the effect of  $\beta$ -catenin knockdown on *in vitro* carboplatin response by  
438 determining the IC<sub>50</sub> for 468'CT iCTNNB1-KD cells in the presence or absence of DOX. Suppressing  
439 the expression of  $\beta$ -catenin had a remarkable effect on carboplatin tolerance. DOX-treated iCTNNB1-  
440 KD cells displayed a substantial reduction in measured IC<sub>50</sub> compared to non-induced cells (IC<sub>50</sub> -  
441 DOX:  $\sim$ 11  $\mu$ M vs. IC<sub>50</sub> +DOX:  $\sim$ 1  $\mu$ M) (Fig. 5B). Importantly, 468'CT iSCRMBl cells displayed no  
442 significant changes in IC<sub>50</sub> (-DOX:  $\sim$ 13  $\mu$ M vs. +DOX:  $\sim$ 11  $\mu$ M) (Supplementary Fig. 4).  
443 Additionally, when exposed to the IC<sub>50</sub> of 468'P cells, 468'CT iCTNNB1-KD cells strongly induced  
444 apoptosis in the presence of DOX, while no difference was observed in iSCRMBl cells (Fig. 5C).

445 Finally, we assessed the effect of  $\beta$ -catenin suppression on tumorsphere formation as a functional  
446 readout for stem cell activity. In line with the downregulation of stem cell marker expression in the  
447 presence of DOX, iCTNNB1-KD cells displayed a significantly lower tumorsphere forming frequency  
448 when  $\beta$ -catenin shRNA was induced. On the other hand, differences upon the induction of SCRMBl  
449 shRNA were negligible (Fig. 5D).

## **Wnt/ $\beta$ -catenin inhibition disrupts drug-tolerance in isogenic carboplatin-resistant models of Triple-Negative Breast Cancer.**

### **450 WNT inhibition disrupts *in vivo* carboplatin tolerance in a carboplatin-resistant TNBC Patient- 451 Derived Xenograft.**

452 Patient-derived xenografts are essential *in vivo models* of human neoplasms. Moreover, PDX models  
453 retain with excellent fidelity histological and molecular features of originating tumors, therefore  
454 representing essential tools for assessing drug resistance and response (53–55).

455 To study whether, like in 468'CT cells, *in vivo* PORCN inhibition with LGK974 re-establishes  
456 carboplatin sensitivity, we used an isogenic carboplatin-resistant TNBC PDX (C4O) obtained from a  
457 previously chemotherapy-sensitive model (BRC016) (35). In brief, ten mice bearing BRC016 tumors  
458 were treated with 50 mg/kg of carboplatin once weekly for three weeks. Nine out of ten BRC016-  
459 bearing mice achieved a complete response to treatment with no tumors detectable. However, one  
460 tumor displayed a late response and, despite undergoing a substantial volume reduction, became  
461 tolerant to further treatment. The non-responder xenograft eventually regrew from the post-treatment  
462 residual tumor (Fig. 6A). Material from the regrown tumor was collected to establish an isogenic model  
463 of carboplatin-resistant TNBC (C4O) and gene expression analysis revealed changes in Wnt signaling  
464 target *AXIN2* and pluripotency and stem markers *NANOG*, *OCT4*, *SOX2*, and *LGR5* (Fig. 6B).

465 *In vivo* carboplatin tolerance was maintained in subsequent generations of transplanted C4O PDX  
466 models. We detected no significant differences in mean final tumor volumes in animals treated with  
467 vehicle or 50mg/kg carboplatin, administered once weekly intraperitoneally, for three weeks  
468 (Supplementary Fig. 5A). However, combinatorial treatment with daily dosing of PORCN inhibitor  
469 LGK974 drastically reduced C4O tumor growth (Fig. 6C and Supplementary Fig. 5A). Interestingly,  
470 LGK or CAR alone could not reduce C4O growth (Fig. 6C), and no significant differences in mean  
471 final tumor volumes between VEH, CAR, and LGK-treated animals were observed. Importantly, we  
472 did not find differences in Ki67 positivity between any treatment arms, indicating that reduced tumor  
473 growth in CAR+LGK treated animals was not due to differences in proliferation (Supplementary Fig.  
474 5B).

475 Gene expression analysis by RT-PCR revealed that similar to what we observed upon treating 468'CT  
476 cells with LGK, inhibition of PORCN in C4O led to the depletion of pluripotency marker expression  
477 both in the presence or absence of carboplatin (Fig. 6D).

478 Finally, given the absence of alterations in the expression of Ki67, we sought out to understand whether  
479 the drastic reduction in tumor growth in animals treated with the combination of CAR and LGK could  
480 be due to increased apoptotic cell death. For this, we performed fluorescent terminal deoxynucleotidyl  
481 transferase dUTP nick end labeling (TUNEL) to detect DNA fragmentation as a readout of apoptosis.  
482 We combined TUNEL staining with human pan-cytokeratin immunolabeling to enable quantification  
483 of apoptotic signal specifically in cancer cells. No differences in TUNEL positivity were measured in  
484 VEH, LGK, and CAR treated animals. However, animals treated with the combination of CAR and  
485 LGK displayed a significant increase in apoptotic TUNEL signal (Fig. 6E)

### **486 Wnt signaling is deregulated in patients with platinum-resistant TNBCs, high-grade serous 487 ovarian cancer.**

488 To understand whether alterations in Wnt signaling are prevalent in platinum-resistant human TNBCs,  
489 we analyzed a public RNA microarray dataset (GSE103668) comprised of 21 pre-treatment samples

## Wnt-inhibition resensitizes carboplatin-resistant TNBC.

490 from TNBC patients treated with cisplatin and bevacizumab (56). Due to the scarcity of additional  
491 platinum-treated TNBC transcriptomic data available in public repositories, we decided to include a  
492 supplementary dataset from high-grade serous ovarian cancer (HGSOC) (E-MTAB-7083) (Fig. 7A).  
493 The reason for this choice lies in the extensive use of platinum-based chemotherapy in this type of  
494 cancer and the striking overlap in clinical and molecular features between HGSOC and TNBC (57).

495 In both human datasets, the available clinical metadata was analyzed to classify patients based on  
496 response to treatment, and differential gene expression was calculated between responders and non-  
497 responders. Interestingly, GSEA analysis on ranked differentially expressed genes using the KEGG  
498 database retrieved Wnt Signaling as one of the top enriched terms with False Discovery Rate (FDR)  
499 <10% in TNBC and HGSOC patients with no response to platinum therapy (Fig. 7B). Other enriched  
500 KEGG terms comprised biological processes such as focal adhesion, extracellular matrix interaction,  
501 and other signaling pathways such as TGF $\beta$  and Hedgehog. Enrichment maps of GSEA hits for both  
502 datasets contained distinctive Wnt-related clusters involving gene sets with overlapping enriched genes  
503 such as "Melanogenesis" and "Basal Cell Carcinoma" for TNBC patients and HGSOC, with the  
504 addition of "Hedgehog Signaling Pathway" in the latter (Fig. 7C). To obtain a broader perspective of  
505 the function of differentially expressed genes, we performed functional enrichment analysis for both  
506 datasets using gProfiler to retrieve enriched gene ontology, Reactome, and Wikipathway gene sets to  
507 build enrichment maps. In both datasets, we obtained a distinctive cluster of Wnt-related terms,  
508 including regulating both canonical and non-canonical Wnt signaling in TNBC and regulating  
509 pluripotency and Wnt ligand biogenesis and secretion in HGSOC (Fig. 7D).

510 Altogether, these results highlight Wnt signaling's importance in mediating platinum resistance in  
511 human TNBC and suggest transversal resistance mechanisms across TNBC and HGSOC.

## 512 4 Discussion

513 Primary and acquired resistance to chemotherapy poses a critical hurdle in the treatment of cancer.  
514 This is particularly important in TNBC due to the relatively limited therapeutic toolbox available and  
515 the daunting clinical characteristics of this disease. In the continued absence of targeted molecular  
516 therapies, we must strive to improve response to current therapeutic options given the high probability  
517 of shorter survival when pCR is not achieved. The use of platinum compounds in combination with  
518 other agents or as a standalone treatment in TNBC is still under intense investigation but already shows  
519 the potential to improve pCR rates in this breast cancer subtype. However, how TNBCs specifically  
520 develop resistance to platinum-based treatment is still a poorly understood process.

521 In this study, we used an isogenic carboplatin-resistant TNBC cell line and used next-generation  
522 mRNA sequencing to identify transcriptomic differences between sensitive and resistant cells.  
523 Functional enrichment analysis indicated, among others, the existence of profound differences in  
524 transcription of Wnt and pluripotency-related genes. We deemed this observation significant since Wnt  
525 signaling is intrinsically associated with tumorigenesis, and several studies have demonstrated the  
526 involvement of this pathway in mediating resistance to chemotherapy and radiation in different types  
527 of cancer, including breast (30,34,58–60). Wnt signaling is also known to specifically mediate platinum  
528 resistance in endometrial cancer (61), ovarian (62), and oral squamous cell carcinoma (63).  
529 Nonetheless, little is known regarding the role of Wnt signaling in mediating resistance to platinum in  
530 TNBC. Interestingly, Wnt is often deregulated in breast cancers, particularly TNBCs, despite the  
531 negligible frequency of mutations in Wnt pathway components. Significantly, Wnt activation is  
532 associated with poor clinical outcomes in TNBC (64).

## Wnt/ $\beta$ -catenin inhibition disrupts drug-tolerance in isogenic carboplatin-resistant models of Triple-Negative Breast Cancer.

533 Based on the transcriptomic data herein generated, we hypothesized that stem-cell gene expression and  
534 carboplatin resistance could be induced on parental MDA-MB-468 cells by manipulating Wnt  
535 signaling. For this, we first used CHIR, a small molecule inhibitor of GSK3 $\beta$ , thereby activating Wnt.  
536 Our results showed a significant increase in pluripotency marker expression and reduced apoptosis  
537 upon concomitant treatment with Wnt agonist and carboplatin. Past studies regarding the role of this  
538 multi-substrate kinase in treatment resistance are rather intriguing. While our results confirm other  
539 studies that report the enrichment of stem cell features upon GSK3 $\beta$  inhibition (65,66), they seem to  
540 contradict reports of GSK3 inhibition leading to reduction of tumor growth and apoptosis (67–69).  
541 Nonetheless, by overexpressing  $\beta$ -catenin in parental cells, we could replicate the phenotype of the  
542 isogenic carboplatin-resistant cells and GSK3 $\beta$  inhibition extensively. Namely,  $\beta$ -catenin  
543 overexpression induced a significant increase in expression of pluripotency markers and increased  
544 carboplatin tolerance, highlighting the role of Wnt pathway activation on drug resistance in TNBC.

545 Our results show an increase in the cancer stem cell population (CD44<sup>+</sup>/CD24<sup>-</sup>, ALDH<sup>+</sup>) concomitantly  
546 with higher expression of pluripotent markers such as *OCT4* and *NANOG* and *cMYC* and cancer stem  
547 marker *LGR5* in carboplatin tolerant model and Wnt active cells. LGR5 is known to maintain somatic  
548 and cancer stem cells in different tissues and cancers, including breast (46,70), to mediate cisplatin  
549 resistance in cervical cancer (71) and has been demonstrated to be a strong predictor of recurrence in  
550 estrogen receptor-negative breast cancer (72). Besides, NANOG expression predicts inadequate  
551 response to platinum in advanced non-small cell lung and oral squamous cell carcinomas (73,74).

552 Inhibition of Wnt ligand secretion using LGK974 in isogenic carboplatin-tolerant cells disrupted stem  
553 cell markers' expression and reversed resistance. Interestingly, inhibition of Wnt ligand secretion alone  
554 was not enough to induce apoptosis in either carboplatin sensitive or resistant cells, despite severely  
555 downregulating stem cell markers' expression. This indicates that Wnt secretory signals are not  
556 necessarily essential for the survival of either sensitive or resistant cells, but rather that these signals  
557 prime the latter for survival upon challenge by carboplatin.

558 LGK974 prevents the secretion of all Wnt ligands by inhibiting the palmitoyl acyltransferase PORCN.  
559 In vertebrates, the WNT family of lipid-modified secreted signaling proteins comprises 19 members,  
560 conferring a great deal of complexity to Wnt signaling. Wnt signaling includes a canonical or Wnt/ $\beta$ -  
561 catenin dependent pathway and the non-canonical or  $\beta$ -catenin-independent pathway (75). For that  
562 reason, it was essential to determine whether LGK974-induced carboplatin sensitivity was mediated  
563 directly by  $\beta$ -catenin. Silencing  $\beta$ -catenin downregulated stem cell markers' expression and  
564 dramatically reversed tolerance to carboplatin, phenocopying LGK974 effects, and directly implicating  
565 canonical Wnt signaling.

566 Inhibition of Wnt ligand secretion, namely through the inhibition of PORCN, has been under scrutiny  
567 during the last decade as a potential therapeutic approach for different types of cancer. LGK974  
568 specifically has shown excellent pre-clinical efficacy in Wnt-addicted models (76) and is under  
569 examination in phase I clinical trial for several Wnt-dependent solid malignancies, including TNBC  
570 (NCT01351103) (77). We evaluated whether this molecule could resensitize an *in vivo* model of  
571 carboplatin-resistant TNBC. Previous studies reported that LGK974 alone significantly reduces the  
572 growth of a murine mouse mammary tumor-Wnt3 model (76). To our surprise, daily dosing of LGK974  
573 alone had no impact on tumor growth. This is analogous to what we observed when treating  
574 carboplatin-resistant cells with LGK974 alone. Importantly, we observed a significant reduction of  
575 tumor growth in animals treated with a combination of daily LGK974 and weekly carboplatin.

## **Wnt-inhibition resensitizes carboplatin-resistant TNBC.**

576 Finally, we were able to identify similarities in transcriptional profiles of patients with platinum-  
577 refractory ovarian and triple-negative breast neoplasms. Wnt signaling deregulation is a common  
578 denominator in both datasets we analyzed. Given the overlapping clinical and molecular features of  
579 both cancer types, it would be interesting to investigate whether transversal resistance mechanisms  
580 exist for other therapies.

581 Altogether, this study demonstrates that response to platinum can be improved and stable *in vitro*, and  
582 *in vivo* resistance can be reversed by a combinatorial approach to TNBC treatment which leverages the  
583 inhibition of Wnt-signaling to disrupt resistance-inducing cancer stem cell functions.

### **584 5 Data Availability Statement**

585 The transcriptomic datasets generated in this study are available from ArrayExpress under the  
586 accession number E-MTAB-10337.

### **587 6 Ethics Statement**

588 Tumor tissue for PDX implantation was acquired from a patient who provided written informed  
589 consent, and the procedure was approved by the Commission of Medical Ethics of the University  
590 Hospitals Leuven (approval numbers S54185 and ML8713). The PDX models herein used are now  
591 banked at the Trace Patient Derived Tumor Xenograft Platform of UZ Leuven/KU Leuven. All animal  
592 experiments were performed at the Trace PDX platform and were approved by the Ethics Committee  
593 Research UZ/KU Leuven (approval number P038/2015).

### **594 7 Author Contributions**

595 WO and FL conceived and designed the study. SM generated *in-vitro* models of carboplatin resistance  
596 and the carboplatin-resistant C4O PDX under the supervision of DA and FA. YL generated the  
597 transgenic cell lines used in this study. WO and SM conducted all *in vivo* experimental work. EC  
598 conducted immunohistochemistry experiments. BV performed RNA-sequencing differential  
599 expression analysis, and WO performed downstream functional enrichment and visualizations. WO  
600 and partially YL carried out all flow-cytometry experiments. PA performed Western blots. WO carried  
601 out the remainder of the experimental work. Data analysis and figure preparation were performed by  
602 WO and reviewed by SM, DA, and FL. The manuscript was written by WO and reviewed, and  
603 approved by all authors. FL secured funding and supervised and guided experimental work and  
604 manuscript preparation. KK, JJV, MFB, and FA made comments on formatting, editing, and data  
605 analysis. All authors contributed to the article and approved the submitted version. WO and SM are  
606 co-first authors. DA and FLL are co-last authors.

### **607 8 Funding**

608 Willy A. A. Oliveira and Bernard K. van der Veer are funded by the Research Foundation-Flanders  
609 with Ph.D. fellowships 1155619N and 11E7920N, respectively. Emanuela E. Cortesi holds a  
610 fellowship from Stichting Tegen Kanker – the Belgian Foundation against Cancer ( FAF-F/2016/822,  
611 fellowship number ZKD2498-00-W02). The authors would like to extend their gratitude to the  
612 Research Foundation – Flanders (FWO) for G091521N grant (FLL and DA) and to Jo Van Biesbroeck,  
613 the breast cancer research fund Nadine de Beaufort and the KU Leuven Research Fund (C24/17/073)  
614 for funding the development of the models used in this research study (FA). FA is a senior researcher  
615 for the Research Foundation-Flanders (FWO). Trace staff is supported by the Stichting Tegen Kanker  
616 grant 2016-054.

## Wnt/ $\beta$ -catenin inhibition disrupts drug-tolerance in isogenic carboplatin-resistant models of Triple-Negative Breast Cancer.

### 617 9 Conflicts of Interest

618 The authors have no conflicts of interest to declare.

### 619 10 Acknowledgments

620 We would like to give show their gratitude to Anchel de Jaime Soguero for his critical review of the  
621 manuscript. We also sincerely thank the Trace Leuven PDX platform for their help in setting up  
622 mouse experiments. Trace is part of the EurOPDX consortium.

### 623 11 Supplementary Material

624 Supplementary Table 1: Differentially expressed genes and GSEA of 468'CT vs 468'P

625 Supplementary Table 2: Differentially expressed genes and GSEA of 468'OE vs 468'P

626 Supplementary Table 3: Primer List

### 627 12 References

- 628 1. Carey L, Winer E, Viale G, Cameron D, Gianni L. Triple-negative breast cancer: Disease  
629 entity or title of convenience? *Nat Rev Clin Oncol* (2010) **7**:683–692.  
630 doi:10.1038/nrclinonc.2010.154
- 631 2. Marra A, Trapani D, Viale G, Criscitiello C, Curigliano G. Practical classification of triple-  
632 negative breast cancer: intratumoral heterogeneity, mechanisms of drug resistance, and novel  
633 therapies. *npj Breast Cancer* (2020) **6**:1–16. doi:10.1038/s41523-020-00197-2
- 634 3. Liedtke C, Mazouni C, Hess KR, André F, Tordai A, Mejia JA, Symmans WF, Gonzalez-  
635 Angulo AM, Hennessy B, Green M, et al. Response to neoadjuvant therapy and long-term  
636 survival in patients with triple-negative breast cancer. *J Clin Oncol* (2008) **26**:1275–1281.  
637 doi:10.1200/JCO.2007.14.4147
- 638 4. Rottenberg S, Disler C, Perego P. The rediscovery of platinum-based cancer therapy. *Nat Rev*  
639 *Cancer* (2021) **21**:37–50. doi:10.1038/s41568-020-00308-y
- 640 5. Turner NC, Reis-Filho JS, Russell AM, Springall RJ, Ryder K, Steele D, Savage K, Gillett  
641 CE, Schmitt FC, Ashworth A, et al. BRCA1 dysfunction in sporadic basal-like breast cancer.  
642 *Oncogene* (2007) **26**:2126–2132. doi:10.1038/sj.onc.1210014
- 643 6. Shafee N, Smith CR, Wei S, Kim Y, Mills GB, Hortobagyi GN, Stanbridge EJ, Lee EYHP.  
644 Cancer stem cells contribute to cisplatin resistance in Brca1/p53-mediated mouse mammary  
645 tumors. *Cancer Res* (2008) **68**:3243–3250. doi:10.1158/0008-5472.CAN-07-5480
- 646 7. Von Minckwitz G, Schneeweiss A, Loibl S, Salat C, Denkert C, Rezai M, Blohmer JU,  
647 Jackisch C, Paepke S, Gerber B, et al. Neoadjuvant carboplatin in patients with triple-negative  
648 and HER2-positive early breast cancer (GeparSixto; GBG 66): A randomised phase 2 trial.  
649 *Lancet Oncol* (2014) **15**:747–756. doi:10.1016/S1470-2045(14)70160-3



## Wnt-inhibition resensitizes carboplatin-resistant TNBC.

- 650 8. Sikov WM, Berry DA, Perou CM, Singh B, Cirrincione CT, Tolaney SM, Kuzma CS, Pluard  
651 TJ, Somlo G, Port ER, et al. Impact of the addition of carboplatin and/or bevacizumab to  
652 neoadjuvant once-per-week paclitaxel followed by dose-dense doxorubicin and  
653 cyclophosphamide on pathologic complete response rates in stage II to III triple-negative  
654 breast cancer: CALGB 40603 (A. *J Clin Oncol* (2015) **33**:13–21.  
655 doi:10.1200/JCO.2014.57.0572
- 656 9. Loibl S, O'Shaughnessy J, Untch M, Sikov WM, Rugo HS, McKee MD, Huober J, Golshan  
657 M, von Minckwitz G, Maag D, et al. Addition of the PARP inhibitor veliparib plus carboplatin  
658 or carboplatin alone to standard neoadjuvant chemotherapy in triple-negative breast cancer  
659 (BrighTNess): a randomised, phase 3 trial. *Lancet Oncol* (2018) **19**:497–509.  
660 doi:10.1016/S1470-2045(18)30111-6
- 661 10. Iwase M, Ando M, Aogi K, Aruga T, Inoue K, Shimomura A, Tokunaga E, Masuda N,  
662 Yamauchi H, Yamashita T, et al. Long-term survival analysis of addition of carboplatin to  
663 neoadjuvant chemotherapy in HER2-negative breast cancer. *Breast Cancer Res Treat* (2020)  
664 **180**:687–694. doi:10.1007/s10549-020-05580-y
- 665 11. Zhou J, Kang Y, Chen L, Wang H, Liu J, Zeng S, Yu L. The Drug-Resistance Mechanisms of  
666 Five Platinum-Based Antitumor Agents. *Front Pharmacol* (2020) **11**:1–17.  
667 doi:10.3389/fphar.2020.00343
- 668 12. Wang L, Jin F, Qin A, Hao Y, Dong Y, Ge S, Dai K. Targeting Notch1 signaling pathway  
669 positively affects the sensitivity of osteosarcoma to cisplatin by regulating the expression  
670 and/or activity of Caspase family. *Mol Cancer* (2014) **13**:139. doi:10.1186/1476-4598-13-139
- 671 13. Jin L, Chun J, Pan C, Li D, Lin R, Alesi GN, Wang X, Kang HB, Song L, Wang D, et al.  
672 MAST1 Drives Cisplatin Resistance in Human Cancers by Rewiring cRaf-Independent MEK  
673 Activation. *Cancer Cell* (2018) **34**:315-330.e7. doi:10.1016/j.ccell.2018.06.012
- 674 14. Seidl C, Panzitt K, Bertsch A, Brcic L, Schein S, Mack M, Leithner K, Prinz F, Olschewski H,  
675 Kornmueller K, et al. MicroRNA-182-5p regulates hedgehog signaling pathway and  
676 chemosensitivity of cisplatin-resistant lung adenocarcinoma cells via targeting GLI2. *Cancer*  
677 *Lett* (2020) **469**:266–276. doi:10.1016/j.canlet.2019.10.044
- 678 15. Atkinson CJ, Kawamata F, Liu C, Ham S, Györfy B, Munn AL, Wei MQ, Möller A,  
679 Whitehall V, Wiegman AP. EGFR and Prion protein promote signaling via FOXO3a-KLF5  
680 resulting in clinical resistance to platinum agents in colorectal cancer. *Mol Oncol* (2019)  
681 **13**:725–737. doi:10.1002/1878-0261.12411
- 682 16. Akrap N, Andersson D, Bom E, Gregersson P, Ståhlberg A, Landberg G. Identification of  
683 Distinct Breast Cancer Stem Cell Populations Based on Single-Cell Analyses of Functionally  
684 Enriched Stem and Progenitor Pools. *Stem Cell Reports* (2016) **6**:121–136.  
685 doi:10.1016/j.stemcr.2015.12.006
- 686 17. Pattabiraman DR, Weinberg RA. Tackling the cancer stem cells — what challenges do they  
687 pose? *Nat Rev Drug Discov* (2014) **13**:497–512. doi:10.1038/nrd4253
- 688 18. Moore N, Lyle S. Quiescent, slow-cycling stem cell populations in cancer: a review of the  
689 evidence and discussion of significance. *J Oncol* (2011) **2011**:1–11. doi:10.1155/2011/396076

## Wnt/ $\beta$ -catenin inhibition disrupts drug-tolerance in isogenic carboplatin-resistant models of Triple-Negative Breast Cancer.

- 690 19. Koury J, Zhong L, Hao J. Targeting Signaling Pathways in Cancer Stem Cells for Cancer  
691 Treatment. *Stem Cells Int* (2017) **2017**: doi:10.1155/2017/2925869
- 692 20. Badve S, Nakshatri H. Breast-cancer stem cells-beyond semantics. *Lancet Oncol* (2012)  
693 **13**:e43–e48. doi:10.1016/S1470-2045(11)70191-7
- 694 21. Clevers H. The cancer stem cell: Premises, promises and challenges. *Nat Med* (2011) **17**:313–  
695 319. doi:10.1038/nm.2304
- 696 22. Yang F, Xu J, Tang L, Guan X. Breast cancer stem cell: the roles and therapeutic implications.  
697 *Cell Mol Life Sci* (2017) **74**:951–966. doi:10.1007/s00018-016-2334-7
- 698 23. Al-Hajj M, Wicha MS, Benito-Hernandez A, Morrison SJ, Clarke MF. Prospective  
699 identification of tumorigenic breast cancer cells. *Proc Natl Acad Sci* (2003) **100**:3983–3988.  
700 doi:10.1073/pnas.0530291100
- 701 24. Wei W, Lewis MT. Identifying and targeting tumor-initiating cells in the treatment of breast  
702 cancer. *Endocr Relat Cancer* (2015) **22**:R135–R155. doi:10.1530/ERC-14-0447
- 703 25. Li W, Ma H, Zhang J, Zhu L, Wang C, Yang Y. Unraveling the roles of CD44/CD24 and  
704 ALDH1 as cancer stem cell markers in tumorigenesis and metastasis. *Sci Rep* (2017) **7**:1–15.  
705 doi:10.1038/s41598-017-14364-2
- 706 26. Ben-Porath I, Thomson MW, Carey VJ, Ge R, Bell GW, Regev A, Weinberg RA. An  
707 embryonic stem cell-like gene expression signature in poorly differentiated aggressive human  
708 tumors. *Nat Genet* (2008) **40**:499–507. doi:10.1038/ng.127
- 709 27. Zhan T, Rindtorff N, Boutros M. Wnt signaling in cancer. *Oncogene* (2017) **36**:1461–1473.  
710 doi:10.1038/onc.2016.304
- 711 28. Van Der Wal T, Van Amerongen R. Walking the tight wire between cell adhesion and WNT  
712 signalling: A balancing act for  $\beta$ -catenin: A balancing act for CTNNB1. *Open Biol* (2020) **10**:  
713 doi:10.1098/rsob.200267rsob200267
- 714 29. Niehrs C, Acebron SP. Mitotic and mitogenic Wnt signalling. *EMBO J* (2012) **31**:2705–2713.  
715 doi:10.1038/emboj.2012.124
- 716 30. Jun S, Jung YS, Suh HN, Wang W, Kim MJ, Oh YS, Lien EM, Shen X, Matsumoto Y,  
717 McCrea PD, et al. LIG4 mediates Wnt signalling-induced radioresistance. *Nat Commun* (2016)  
718 **7**:1–13. doi:10.1038/ncomms10994
- 719 31. Chen S, Guttridge DC, You Z, Zhang Z, Fribley A, Mayo MW, Kitajewski J, Wang CY. Wnt-  
720 1 signaling inhibits apoptosis by activating  $\beta$ -catenin/T cell factor-mediated transcription. *J*  
721 *Cell Biol* (2001) **152**:87–96. doi:10.1083/jcb.152.1.87
- 722 32. Malanchi I, Santamaria-Martínez A, Susanto E, Peng H, Lehr HA, Delaloye JF, Huelsken J.  
723 Interactions between cancer stem cells and their niche govern metastatic colonization. *Nature*  
724 (2012) **481**:85–91. doi:10.1038/nature10694

## Wnt-inhibition resensitizes carboplatin-resistant TNBC.

- 725 33. Roy S, Kar M, Roy S, Padhi S, Kumar A, Thakur S, Akhter Y, Gatto G, Banerjee B. Inhibition  
726 of CD44 sensitizes cisplatin-resistance and affects Wnt/ $\beta$ -catenin signaling in HNSCC cells.  
727 *Int J Biol Macromol* (2020) **149**:501–512. doi:10.1016/j.ijbiomac.2020.01.131
- 728 34. Xie S-L, Fan S, Zhang S-Y, Chen W-X, Li Q-X, Pan G-K, Zhang H-Q, Wang W-W, Weng B,  
729 Zhang Z, et al. SOX8 regulates cancer stem-like properties and cisplatin-induced EMT in  
730 tongue squamous cell carcinoma by acting on the Wnt/ $\beta$ -catenin pathway. *Int J Cancer* (2018)  
731 **142**:1252–1265. doi:10.1002/ijc.31134
- 732 35. Moens S, Zhao P, Baietti MF, Marinelli O, Van Haver D, Impens F, Floris G, Marangoni E,  
733 Neven P, Annibaldi D, et al. The mitotic checkpoint is a targetable vulnerability of carboplatin-  
734 resistant triple negative breast cancers. *Sci Rep* (2021) **11**:1–13. doi:10.1038/s41598-021-  
735 82780-6
- 736 36. Patro R, Duggal G, Love MI, Irizarry RA, Kingsford C. Salmon provides fast and bias-aware  
737 quantification of transcript expression. *Nat Methods* (2017) **14**:417–419.  
738 doi:10.1038/nmeth.4197
- 739 37. Love MI, Huber W, Anders S. Moderated estimation of fold change and dispersion for RNA-  
740 seq data with DESeq2. *Genome Biol* (2014) **15**:1–21. doi:10.1186/s13059-014-0550-8
- 741 38. Stephens M. False discovery rates: A new deal. *Biostatistics* (2017) **18**:275–294.  
742 doi:10.1093/biostatistics/kxw041
- 743 39. Zhou G, Soufan O, Ewald J, Hancock REW, Basu N, Xia J. NetworkAnalyst 3.0: A visual  
744 analytics platform for comprehensive gene expression profiling and meta-analysis. *Nucleic  
745 Acids Res* (2019) **47**:W234–W241. doi:10.1093/nar/gkz240
- 746 40. Müller AC, Giambruno R, Weißer J, Májek P, Hofer A, Bigenzahn JW, Superti-Furga G,  
747 Jessen HJ, Bennett KL, Matsushima Y, et al. Pathway enrichment analysis and visualization of  
748 omics data using g:Profiler, GSEA, Cytoscape and EnrichmentMap. *Nat Protoc* (2019)  
749 **22**:924–934. Available at: [http://dx.doi.org/10.1038/s41596-018-0103-](http://dx.doi.org/10.1038/s41596-018-0103-9)  
750 [9%0Ahttp://dx.doi.org/10.1016/j.bbagr.2011.11.008](http://dx.doi.org/10.1016/j.bbagr.2011.11.008)[%0Ahttp://dx.doi.org/10.1038/srep2810](http://dx.doi.org/10.1038/srep28107)  
751 [7](http://dx.doi.org/10.1038/srep28107)
- 752 41. Yoon S, Kim SY, Nam D. Improving gene-set enrichment analysis of RNA-Seq data with  
753 small replicates. *PLoS One* (2016) **11**:1–16. doi:10.1371/journal.pone.0165919
- 754 42. Bankhead P, Loughrey MB, Fernández JA, Dombrowski Y, McArt DG, Dunne PD, McQuaid  
755 S, Gray RT, Murray LJ, Coleman HG, et al. QuPath: Open source software for digital  
756 pathology image analysis. *Sci Rep* (2017) **7**:1–7. doi:10.1038/s41598-017-17204-5
- 757 43. Koopman G, Reutelingsperger CP, Kuijten GA, Keehnen RM, Pals ST, van Oers MH.  
758 Annexin V for flow cytometric detection of phosphatidylserine expression on B cells  
759 undergoing apoptosis. *Blood* (1994) **84**:1415–20. doi:10.1182/blood.V84.5.1415.1415
- 760 44. Engelmann K, Shen H, Finn OJ. MCF7 side population cells with characteristics of cancer  
761 stem/progenitor cells express the tumor antigen MUC1. *Cancer Res* (2008) **68**:2419–2426.  
762 doi:10.1158/0008-5472.CAN-07-2249

## Wnt/ $\beta$ -catenin inhibition disrupts drug-tolerance in isogenic carboplatin-resistant models of Triple-Negative Breast Cancer.

- 763 45. Croker AK, Allan AL. Inhibition of aldehyde dehydrogenase (ALDH) activity reduces  
764 chemotherapy and radiation resistance of stem-like ALDH hiCD44 + human breast cancer  
765 cells. *Breast Cancer Res Treat* (2012) **133**:75–87. doi:10.1007/s10549-011-1692-y
- 766 46. Yang L, Xie X, Tang H, Kong Y, Xie X, Chen J, Song C, Liu X, Ye F, Li N, et al. LGR5  
767 promotes breast cancer progression and maintains stem-like cells through activation of wnt/ $\beta$ -  
768 catenin signaling. *Stem Cells* (2015) **33**:2913–2924. doi:10.1002/stem.2083
- 769 47. Ponti D, Costa A, Zaffaroni N, Pratesi G, Petrangolini G, Coradini D, Pilotti S, Pierotti MA,  
770 Daidone MG. Isolation and in vitro propagation of tumorigenic breast cancer cells with  
771 stem/progenitor cell properties. *Cancer Res* (2005) **65**:5506–5511. doi:10.1158/0008-  
772 5472.CAN-05-0626
- 773 48. Fuerer C, Nusse R. Lentiviral vectors to probe and manipulate the Wnt signaling pathway.  
774 *PLoS One* (2010) **5**:e9370. doi:10.1371/journal.pone.0009370
- 775 49. Doble BW, Woodgett JR. GSK-3: Tricks of the trade for a multi-tasking kinase. *J Cell Sci*  
776 (2003) **116**:1175–1186. doi:10.1242/jcs.00384
- 777 50. Guo W, Keckesova Z, Donaher JL, Shibue T, Tischler V, Reinhardt F, Itzkovitz S, Noske A,  
778 Zürrer-Härdis U, Bell G, et al. Slug and Sox9 cooperatively determine the mammary stem cell  
779 state. *Cell* (2012) **148**:1015–1028. doi:10.1016/j.cell.2012.02.008
- 780 51. Barrott JJ, Cash GM, Smith AP, Barrow JR, Murtaugh LC. Deletion of mouse *Porc1* blocks  
781 Wnt ligand secretion and reveals an ectodermal etiology of human focal dermal  
782 hypoplasia/Goltz syndrome. *Proc Natl Acad Sci U S A* (2011) **108**:12752–12757.  
783 doi:10.1073/pnas.1006437108
- 784 52. Lian X, Hsiao C, Wilson G, Zhu K, Hazeltine LB, Azarin SM, Raval KK, Zhang J, Kamp TJ,  
785 Palecek SP. Robust cardiomyocyte differentiation from human pluripotent stem cells via  
786 temporal modulation of canonical Wnt signaling. *Proc Natl Acad Sci* (2012) **109**:E1848–  
787 E1857. doi:10.1073/pnas.1200250109
- 788 53. Bruna A, Rueda OM, Greenwood W, Serra V, Garnett MJ, Caldas Correspondence C. A  
789 Biobank of Breast Cancer Explants with Preserved Intra-tumor Heterogeneity to Screen  
790 Anticancer Compounds In Brief. *Cell* (2016) **167**:260–274. doi:10.1016/j.cell.2016.08.041
- 791 54. Gao H, Korn JM, Ferretti S, Monahan JE, Wang Y, Singh M, Zhang C, Schnell C, Yang G,  
792 Zhang Y, et al. High-throughput screening using patient-derived tumor xenografts to predict  
793 clinical trial drug response. *Nat Med* (2015) **21**:1318–25. doi:10.1038/nm.3954
- 794 55. Woo XY, Giordano J, Srivastava A, Zhao ZM, Lloyd MW, de Bruijn R, Suh YS, Patidar R,  
795 Chen L, Scherer S, et al. Conservation of copy number profiles during engraftment and  
796 passaging of patient-derived cancer xenografts. *Nat Genet* (2021) **53**:86–99.  
797 doi:10.1038/s41588-020-00750-6
- 798 56. Birkbak NJ, Li Y, Pathania S, Greene-Colozzi A, Dreze M, Bowman-Colin C, Sztupinszki Z,  
799 Krzystanek M, Diossy M, Tung N, et al. Overexpression of BLM promotes DNA damage and

## Wnt-inhibition resensitizes carboplatin-resistant TNBC.

- 800 increased sensitivity to platinum salts in triple-negative breast and serous ovarian cancers. *Ann*  
801 *Oncol* (2018) **29**:903–909. doi:10.1093/annonc/mdy049
- 802 57. Jönsson JM, Johansson I, Dominguez-Valentin M, Kimbung S, Jönsson M, Bonde JH,  
803 Kannisto P, Masbäck A, Malander S, Nilbert M, et al. Molecular subtyping of serous ovarian  
804 tumors reveals multiple connections to intrinsic breast cancer subtypes. *PLoS One* (2014) **9**:  
805 doi:10.1371/journal.pone.0107643
- 806 58. Woodward WA, Chen MS, Behbod F, Alfaro MP, Buchholz TA, Rosen JM. WNT/beta-  
807 catenin mediates radiation resistance of mouse mammary progenitor cells. *Proc Natl Acad Sci*  
808 *U S A* (2007) **104**:618–23. doi:10.1073/pnas.0606599104
- 809 59. Martins-Neves SR, Paiva-Oliveira DI, Wijers-Koster PM, Abrunhosa AJ, Fontes-Ribeiro C,  
810 Bovée JVMG, Cleton-Jansen A-M, Gomes CMF. Chemotherapy induces stemness in  
811 osteosarcoma cells through activation of Wnt/ $\beta$ -catenin signaling. *Cancer Lett* (2016)  
812 **370**:286–295. doi:10.1016/j.canlet.2015.11.013
- 813 60. Jang G-B, Kim J-Y, Cho S-D, Park K-S, Jung J-Y, Lee H-Y, Hong I-S, Nam J-S. Blockade of  
814 Wnt/ $\beta$ -catenin signaling suppresses breast cancer metastasis by inhibiting CSC-like phenotype.  
815 *Sci Rep* (2015) **5**:12465. doi:10.1038/srep12465
- 816 61. Xie W, Liu N, Wang X, Wei L, Xie W, Sheng X. Wilms' Tumor 1-Associated Protein  
817 Contributes to Chemo-Resistance to Cisplatin Through the Wnt /  $\beta$ -Catenin Pathway in  
818 Endometrial Cancer. (2021) **11**:1–13. doi:10.3389/fonc.2021.598344
- 819 62. He S, Wang W, Wan Z, Shen H, Zhao Y, You Z, Liu J, Zhu L. FAM83B inhibits ovarian  
820 cancer cisplatin resistance through inhibiting Wnt pathway. *Oncogenesis* (2021) **10**:  
821 doi:10.1038/s41389-020-00301-y
- 822 63. Mohapatra P, Shriwas O, Mohanty S, Ghosh A, Smita S, Kaushik SR, Arya R, Rath R, Das  
823 Majumdar S, Muduly DK, et al. CMTM6 drives cisplatin resistance by regulating Wnt  
824 signaling through ENO-1/AKT/GSK3 $\beta$  axis. *JCI Insight* (2021) **6**:  
825 doi:10.1172/jci.insight.143643
- 826 64. Geyer FC, Lacroix-Triki M, Savage K, Arnedos M, Lambros MB, MacKay A, Natrajan R,  
827 Reis-Filho JS.  $\beta$ -Catenin pathway activation in breast cancer is associated with triple-negative  
828 phenotype but not with CTNNB1 mutation. *Mod Pathol* (2011) **24**:209–231.  
829 doi:10.1038/modpathol.2010.205
- 830 65. Liao S, Gan L, Qin W, Liu C, Mei Z. Inhibition of GSK3 and MEK induced cancer stem cell  
831 generation via the Wnt and MEK signaling pathways. *Oncol Rep* (2018) **40**:2005–2013.  
832 doi:10.3892/or.2018.6600
- 833 66. Yang Y, Wang QQ, Bozinov O, Xu RX, Sun YL, Wang SS. GSK-3 inhibitor CHIR99021  
834 enriches glioma stem-like cells. *Oncol Rep* (2020) **43**:1479–1490. doi:10.3892/or.2020.7525
- 835 67. Yoshino Y, Ishioka C. Inhibition of glycogen synthase kinase-3 beta induces apoptosis and  
836 mitotic catastrophe by disrupting centrosome regulation in cancer cells. *Sci Rep* (2015) **5**:1–14.  
837 doi:10.1038/srep13249

## Wnt/ $\beta$ -catenin inhibition disrupts drug-tolerance in isogenic carboplatin-resistant models of Triple-Negative Breast Cancer.

- 838 68. Dewi FRP, Domoto T, Hazawa M, Kobayashi A, Douwaki T, Minamoto T, Wong RW.  
839 Colorectal cancer cells require glycogen synthase kinase-3 $\beta$  for sustaining mitosis via  
840 translocated promoter region (TPR)- dynein interaction. *Oncotarget* (2018) **9**:13337–13352.  
841 doi:10.18632/oncotarget.24344
- 842 69. O'Flaherty L, Shnyder SD, Cooper PA, Cross SJ, Wakefield JG, Pardo OE, Seckl MJ, Tavaré  
843 JM. Tumor growth suppression using a combination of taxol-based therapy and GSK3  
844 inhibition in non-small cell lung cancer. *PLoS One* (2019) **14**:1–17.  
845 doi:10.1371/journal.pone.0214610
- 846 70. Sato T, Van Es JH, Snippert HJ, Stange DE, Vries RG, Van Den Born M, Barker N, Shroyer  
847 NF, Van De Wetering M, Clevers H. Paneth cells constitute the niche for Lgr5 stem cells in  
848 intestinal crypts. *Nature* (2011) **469**:415–418. doi:10.1038/nature09637
- 849 71. Cao HZ, Liu XF, Yang WT, Chen Q, Zheng PS. LGR5 promotes cancer stem cell traits and  
850 chemoresistance in cervical cancer. *Cell Death Dis* (2017) **8**:e3039.  
851 doi:10.1038/cddis.2017.393
- 852 72. Hagerling C, Hagerling C, Hagerling C, Owyong M, Sitarama V, Wang CY, Wang CY, Lin C,  
853 Van Den Bijgaart RJE, Van Den Bijgaart RJE, et al. LGR5 in breast cancer and ductal  
854 carcinoma in situ: A diagnostic and prognostic biomarker and a therapeutic target. *BMC*  
855 *Cancer* (2020) **20**:1–14. doi:10.1186/s12885-020-06986-z
- 856 73. Chang B, Park MJ, Choi SI, In KH, Kim CH, Lee SH. NANOG as an adverse predictive  
857 marker in advanced non-small cell lung cancer treated with platinum-based chemotherapy.  
858 *Onco Targets Ther* (2017) **10**:4625–4633. doi:10.2147/OTT.S144895
- 859 74. Kashyap T, Nath N, Mishra P, Jha A, Nagini S, Mishra R. Pluripotency transcription factor  
860 Nanog and its association with overall oral squamous cell carcinoma progression, cisplatin-  
861 resistance, invasion and stemness acquisition. *Head Neck* (2020) **42**:3282–3294.  
862 doi:10.1002/hed.26373
- 863 75. Bejsovec A. Wingless signaling: A genetic journey from morphogenesis to metastasis.  
864 *Genetics* (2018) **208**:1311–1336. doi:10.1534/genetics.117.300157
- 865 76. Liu J, Pan S, Hsieh MH, Ng N, Sun F, Wang T, Kasibhatla S, Vanasse G, Harris JL. Targeting  
866 Wnt-driven cancer through the inhibition of Porcupine by LGK974. (2013) **110**:20224–20229.  
867 doi:10.1073/pnas.1314239110
- 868 77. Novartis. A Study of LGK974 in Patients With Malignancies Dependent on Wnt Ligands.  
869 (2021)ClinicalTrials.gov identifier: NCT01351103. Available at:  
870 [https://clinicaltrials.gov/ct2/show/NCT01351103?id=NCT01351103&draw=2&rank=1&load=](https://clinicaltrials.gov/ct2/show/NCT01351103?id=NCT01351103&draw=2&rank=1&load=cart)  
871 [cart](https://clinicaltrials.gov/ct2/show/NCT01351103?id=NCT01351103&draw=2&rank=1&load=cart)
- 872 78. Raudvere U, Kolberg L, Kuzmin I, Arak T, Adler P, Peterson H, Vilo J. G:Profiler: A web  
873 server for functional enrichment analysis and conversions of gene lists (2019 update). *Nucleic*  
874 *Acids Res* (2019) **47**:W191–W198. doi:10.1093/nar/gkz369

## Wnt-inhibition resensitizes carboplatin-resistant TNBC.

875

876

877

878 **Figure 1** *Carboplatin-tolerant TNBC cells are characterized by enhanced WNT/ $\beta$ -catenin pathway*  
879 *activity, stem cell marker expression, and tumorsphere formation capacity.*

880 A) Phase contrast microscope images of 468'P and 468'CT cells. Scale bar: 100  $\mu$ m.

881 B) Non-linear fit model of [CAR]  $\mu$ M vs normalized response for IC50 determination. (468'P: n=6,  
882  $R^2=0.92$ ) (468'CT: n=4,  $R^2=0.95$ ).

883 C) Representative flow cytometry scatterplots of annexin V staining of cells treated with 2  $\mu$ M CAR  
884 for 72 hours (left) and respective statistical analysis (right) using multiple t-tests corrected for multiple  
885 comparisons with the Holms-Sidak method (n=3).

886 D) Enriched gene sets from Hallmarks and KEGG databases by one-tailed GSEA ranked by  
887 Normalized enrichment score (NES), illustrating pathways most significantly deregulated between  
888 468'P and 468'CT.

889 E) Enrichment map of one-tailed GSEA hits from Wikipathways database. Rectangles highlight  
890 clusters of gene sets with significant overlap and are labeled using AutoAnnotate on Cytoscape.

891 F) GSEA of hESCs (26)(left) and Cancer Progenitor(44) (right) gene sets in 468'CT vs 468'P cells.

892 G) GSEA of NANOG, OCT4 and SOX2 target genes determined by CHIP-SEQ in hESC's (26) in  
893 468'CT vs 468'P cells.

894 H) Western blot of active non-phosphorylated  $\beta$ -catenin in 468'P and 468'CT.  $\beta$ -actin was used as the  
895 loading control.

896 I) Representative scatterplots of flow cytometric analysis of aldehyde dehydrogenase activity (left).  
897 DEAB panels refer to internal controls in which ALDH activity is blocked with  
898 diethylaminobenzaldehyde to determine background signal generated by unconverted ALDH  
899 substrate. TEST panels refer to the experimental samples where substrate for fluorimetric  
900 determination of ALDH activity is supplied. TEST samples are normalized to background fluorescence  
901 measured in DEAB internal controls and presented as the mean + standard error of the mean percentage  
902 of ALDH+ cells in 468'CT (n=5) and 468'P (n=7) (right). Welch's t-test.

903 J) Representative scatterplots of flow cytometric analysis of CD44-PE and CD24-APC  
904 immunolabeling (left) and corresponding statistical analysis of the mean percentage of CD44<sup>+</sup>/CD24<sup>-</sup>  
905 cells (right; n=3). Welch's t-test.

906 K) qRT-PCR of Wnt target AXIN2 and stem cell markers in 468'CT cells vs. 468'P (n=4). Multiple t-  
907 tests.

908 L) Representative brightfield images of tumorspheres generated from 468'P and 468'CT cells (left,  
909 scale bar: 50  $\mu$ m) and statistical analysis of mean tumorsphere forming units (number of  
910 spheres/number of seeded single cells) (right; n=3). Welch's t-test.

911

912 (Barplots represent mean + SEM. \*  $p < 0.05$ , \*\*  $p < 0.01$ , \*\*\*  $p < 0.001$ , \*\*\*\*  $p < 0,0001$ , ns= non  
913 significant).

914

915 **Figure 2** *Pharmacological in vitro Wnt induction prevents carboplatin-induced apoptosis and*  
916 *upregulates stem cell marker expression.*

917 A) Representative flow cytometry scatterplots (left) of Wnt-reporter MDA-MB-468 TOPGFP cells  
918 treated with vehicle (DMSO) or GSK3 $\beta$  inhibitor (CHIR, 4  $\mu$ M) for 12 hours and statistical analysis  
919 of the mean frequency of GFP+ cells using Welch's t-test (right, n=3).

920 B) Phase-contrast microscopy images of 468'P cells treated with or without carboplatin in the presence  
921 of CHIR or DMSO (left, scale bar: 100  $\mu$ m) and statistical analysis of absolute cell numbers after 72

## Wnt/ $\beta$ -catenin inhibition disrupts drug-tolerance in isogenic carboplatin-resistant models of Triple-Negative Breast Cancer.

922 hours of each treatment using One-way ANOVA corrected for multiple comparisons using the Holm-  
923 Sidak method (n=4).

924 C) Representative flow cytometry scatterplots of annexin V staining of 468'P cells (left) treated with  
925 or without carboplatin in the presence of DMSO or CHIR (4  $\mu$ M) for 72 hours and statistical analysis  
926 of the mean frequency of annexin V positive cells (right) using one-way ANOVA corrected for  
927 multiple comparisons using the Holm-Sidak method (n=3).

928 D) Relative mRNA expression of Wnt target and stem cell markers upon 72-hour treatment with  
929 DMSO or CHIR (4  $\mu$ M) in 468'P cells (n=3). Multiple t-tests with Holm-Sidak correction for multiple  
930 comparisons.

931

932 (Barplots represent mean + SEM. \*  $p < 0.05$ , \*\*  $p < 0.01$ , \*\*\*  $p < 0.001$ , \*\*\*\*  $p < 0.0001$ , ns= non  
933 significant)

934

935 **Figure 3**  *$\beta$ -catenin overexpression in 468'P induces carboplatin-tolerance, pluripotency-related gene*  
936 *expression, and cancer stem cell features.*

937 A) Western blot (top) of total  $\beta$ -catenin in MDA-MB-468 cells transduced with an empty vector or  
938 truncated, constitutively active  $\beta$ -catenin isoform  $\Delta$ N90 and phase-contrast microscopy (down).

939 B) Enriched gene sets from Wikipathways database by one-tailed GSEA of ranked DEGs between  
940 468'OE and 468'P sorted by normalized enrichment score (left) and enrichment map illustrating  
941 pathways most significantly different between 468'OE and 468'P (right).

942 C) Non-linear fit model of [CAR] vs. normalized response for IC50 determination. (468'OE: n=6,  
943  $R^2=0.92$ ; 468'CTRL: n=6,  $R^2=0.95$ ).

944 D) Representative flow cytometry scatterplots of annexin V staining (left) of 468'CTRL and 468'OE  
945 cells treated with carboplatin 2  $\mu$ M for 72h and statistical analysis of the mean frequency of annexin  
946 V positive cells using one-way ANOVA corrected for multiple comparisons using the Holm-Sidak  
947 method (right, n=3).

948 E) mRNA level fold change (Log<sub>2</sub>) of *CTNNB1* ( $\beta$ -catenin), Wnt target *AXIN2*, and stem cell markers  
949 in 468'OE cells vs. 468'CTRL (n=4). Multiple t-tests with Holms-Sidak correction for multiple  
950 comparisons.

951 F) Representative scatterplots of flow cytometric analysis of aldehyde dehydrogenase activity (left)  
952 and statistical analysis of the mean percentage of ALDH+ cells in 468'OE (n=5) and 468'CTRL (n=5)  
953 using Welch's t-test (right).

954 G) Representative scatterplots of flow cytometric analysis of CD44-PE and CD24-APC  
955 immunolabeling (left) and corresponding statistical analysis of the mean percentage of CD44<sup>+</sup>/CD24<sup>-</sup>  
956 cells using Welch's t-test (right; n=3).

957 H) Representative brightfield images of tumorspheres generated from 468'CTRL and 468'OE cells  
958 (left, scale bar: 50  $\mu$ m) and statistical analysis of mean tumorsphere forming units (number of  
959 spheres/number of seeded single cells) using Welch's t-test (right; n=3).

960

961 (Barplots represent mean + SEM. \*  $p < 0.05$ , \*\*  $p < 0.01$ , \*\*\*  $p < 0.001$ , \*\*\*\*  $p < 0.0001$ , ns= non  
962 significant)

963

964 **Figure 4** *Wnt inhibitor LGK974 disrupts carboplatin resistance and pluripotency gene expression.*

965 A) Absolute cell number of 468'CT cells treated for 72 hours with or without LGK974 in the presence  
966 or absence of 2  $\mu$ M carboplatin. Multiple t-tests (n=3).



## Wnt-inhibition resensitizes carboplatin-resistant TNBC.

967 B) Phase-contrast microscopy of 468'CT cells treated for 72 hours with 200 nM LGK974 or DMSO in  
968 the presence or absence of 2  $\mu$ M carboplatin (left). Mean frequency of annexin V positive cells in  
969 468'P and 468'CT cells treated with or without 200 nM LGK974 in presence or absence of 2  
970  $\mu$ M carboplatin showing the resensitization of 'CT cells to carboplatin when co-treated with Wnt  
971 inhibitor (right, n=3). One-way Anova with correction for multiple comparisons using the Holm-Sidak  
972 method.

973 C) Relative mRNA expression of Wnt target and stem cell markers upon 72-hour treatment with  
974 DMSO or 200 nM LGK974 with or without 2  $\mu$ M carboplatin in 468'CT cells (n=3). Multiple t-tests:  
975 Unt vs. Unt+LGK & CAR vs. CAR+LGK.

976  
977 (Barplots represent mean + SEM. \*  $p < 0.05$ , \*\*  $p < 0.01$ , \*\*\*  $p < 0.001$ , \*\*\*\*  $p < 0.0001$ , ns= non  
978 significant)

979  
980 **Figure 5** *Inducible  $\beta$ -catenin shRNA disrupts carboplatin-resistance and stem cell function in 468'CT*  
981 *cells.*

982 A) Relative mRNA expression level of *CTNNB1* ( $\beta$ -catenin) and Wnt target and pluripotency markers  
983 in 468'CT cells transduced with inducible *CTNNB1*-targeting or *SCRMBL* shRNAs, in the presence  
984 or absence of doxycycline (n=3). Welch's t-test (Dox vs. no Dox).

985 B) Non-linear fit model of [CAR] vs normalized response for IC50 determination in iCTNNB1-KD  
986 cells in presence or absence of doxycyclin. (n=3,  $R^2 + \text{DOX}$ : 0.93,  $R^2 - \text{DOX}$ : 0.95).

987 C) Representative scatterplots of flow cytometric analysis of apoptosis by annexin V staining of  
988 468'CT iCTNNB1-KD and 468'CT iSCRMBL cells treated with or without 2  $\mu$ M carboplatin for 72h  
989 in presence or absence of doxycycline (left) and corresponding statistical analysis of the mean  
990 frequency of annexin V positive cells (right, n=6). One-way Anova with correction for multiple  
991 comparisons using the Holm-Sidak method.

992 D) Representative brightfield images of tumorspheres generated from 468'CT iSCRMBL and 468'CT  
993 iCTNNB1-KD cells (left, scale bar: 50  $\mu$ m) and statistical analysis of mean tumorsphere forming units  
994 (number of spheres/number of seeded single cells) (right; n=3). Welch's t-test (Dox vs. no Dox).

995  
996 (Barplots represent mean + SEM. \*  $p < 0.05$ , \*\*  $p < 0.01$ , \*\*\*  $p < 0.001$ , \*\*\*\*  $p < 0.0001$ , ns= non  
997 significant)

998  
999 **Figure 6** *WNT inhibition disrupts in vivo carboplatin-tolerance in a carboplatin-resistant TNBC*  
1000 *Patient-Derived Xenograft.*

1001 A) Tumor growth curves of carboplatin-sensitive BRC016 TNBC PDX model. Nine out of 10 mice  
1002 show complete response to treatment. One animal (red line) had a very delayed response and still had  
1003 residual tumor mass after 3 weeks of treatment. The residual xenograft resumed growth after  
1004 carboplatin-treatment was stopped. This tumor was collected to establish a carboplatin-resistant model  
1005 (C4O).

1006 B) Comparative gene expression analysis by qRT-PCR of Wnt target *AXIN2* and stem cell markers in  
1007 BRC016 carboplatin-sensitive PDX and the C4O carboplatin-resistant isogenic PDX (n=4). Welch's t-  
1008 test.

1009 C) Tumor growth curves of C4O carboplatin-resistant PDX treated with VEH, LGK974, CAR, or  
1010 CAR+LGK showing drastically reduced tumor growth in the combinatorial treatment arm (VEH, CAR,  
1011 CAR+LGK n=6 and LGK n=5) (left). Two-way ANOVA with Tukey correction. The green-shadowed  
1012 area under the curve represents highlights the time points in which the difference between CAR and  
1013 CAR+LGK is statistically significant. Representative photographs of tumors in each treatment arm at  
1014 day 21 of treatment (right).

## Wnt/ $\beta$ -catenin inhibition disrupts drug-tolerance in isogenic carboplatin-resistant models of Triple-Negative Breast Cancer.

1015 D) mRNA level fold change (Log<sub>2</sub>) vs. VEH treatment (no carboplatin and no Wnt inhibitor) in tumors  
1016 dissected at treatment endpoint (21 days) (n=3). Multiple t-tests (VEH vs. LGK and CAR vs.  
1017 CAR+LGK).

1018 E) Representative confocal microscopy images (left) of TUNEL staining in green and human pan-  
1019 cytokeratin immunolabeling in red and respective quantification and statistical analysis of TUNEL  
1020 positive cells (VEH n=4, LGK n=4, CAR & CAR+LGK n=6). One-way ANOVA with correction for  
1021 multiple comparisons using the Holm-Sidak method.

1022  
1023 (Barplots represent mean + SEM. \*  $p < 0.05$ , \*\*  $p < 0.01$ , \*\*\*  $p < 0.001$ , \*\*\*\*  $p < 0.0001$ ), ns= non  
1024 significant)

1025  
1026 **Figure 7** Wnt signaling is deregulated in patients with platinum-resistant TNBCs, high-grade serous  
1027 ovarian cancer, and isogenic cisplatin-resistant ovarian cancer cell lines.

1028 A) Summary of datasets and analysis methodology used. Functional enrichment and mapping as  
1029 previously reported (40,41,78).

1030 B) Enriched KEGG gene sets in patients with platinum-resistant TNBC (left) and HGSOC (right).

1031 C) Enrichment maps for visualization of enriched KEGG gene sets in patients with platinum-resistant  
1032 TNBC (left) and HGSOC (right).

1033 D) Enrichment maps for visualization of gProfiler functional enrichment analysis of ranked,  
1034 upregulated DEGs in patients with platinum-resistant TNBC (left) and HGSOC (right).

1035  
1036 **Supplementary Figure 1**

1037 A) Expression heatmap of Wnt-related genes comprised in gene sets from the WNT Pathway  
1038 Pluripotency cluster from Fig. 1E.

1039 B) Flow cytometry analysis of TOPGFP-Wnt reporter activity in 468'P and 468'CT cells (n=3).

1040  
1041 (Barplots represent mean + SEM. \*  $p < 0.05$ , \*\*  $p < 0.01$ , \*\*\*  $p < 0.001$ , \*\*\*\*  $p < 0.0001$ , ns= non  
1042 significant)

1043  
1044 **Supplementary Figure 2**

1045 A) Phase-contrast microscopy (left, scale bar: 100  $\mu$ m) of MDA-MB-231 cells treated for 72 hours  
1046 with 35  $\mu$ M Carboplatin in the presence or absence of 4  $\mu$ M CHIR and statistical analysis of mean  
1047 absolute cell numbers (n=4). One-way ANOVA with correction for multiple comparisons using the  
1048 Holm-Sidak method.

1049 B) mRNA level fold change (Log<sub>2</sub>) Wnt target *AXIN2*, and stem cell markers in MDA-MB-231 cells  
1050 treated with 4  $\mu$ M CHIR vs. DMSO (n=1, average of technical replicates).

1051  
1052 (Barplots represent mean + SEM. \*  $p < 0.05$ , \*\*  $p < 0.01$ , \*\*\*  $p < 0.001$ , \*\*\*\*  $p < 0.0001$ , ns= non  
1053 significant)

1054  
1055 **Supplementary Figure 3**

1056 A) GSEA of hESCs (26) (left), Cancer Progenitor (44) (center), and pluripotency transcription target  
1057 gene sets (26) (right) in 468'OE vs 468'P cells.

1058 B) Phase-contrast microscopy (scale bar: 100  $\mu$ m) of control MDA-MB-23 and 231'OE ( $\Delta$ n90  $\beta$ -  
1059 catenin overexpression).

## **Wnt-inhibition resensitizes carboplatin-resistant TNBC.**

1060 C) Western blot of total  $\beta$ -catenin in MDA-MB-231 cells transduced with an empty vector or truncated,  
1061 constitutively active  $\beta$ -catenin isoform  $\Delta$ N90.  $\beta$ -actin was used as a loading control.

1062 D) Non-linear fit model of [CAR] vs. normalized response for IC50 determination (right). (n=2)

1063 E) Representative scatterplots of flow cytometric analysis of aldehyde dehydrogenase activity (left)  
1064 and statistical analysis of the mean percentage of ALDH+ cells in 231'OE and 231'Ctrl cells using  
1065 Welch's t-test (n=5) (right).

1066 F) Representative brightfield images of tumorspheres generated from 231'Ctrl and 231'OE cells (left,  
1067 scale bar: 100  $\mu$ m) and statistical analysis of mean tumorsphere forming units (number of  
1068 spheres/number of seeded single cells) (right; n=3). Welch's t-test.

1069  
1070 (Barplots represent mean + SEM. \*  $p < 0.05$ , \*\*  $p < 0.01$ , \*\*\*  $p < 0.001$ , \*\*\*\*  $p < 0.0001$ , ns= non  
1071 significant)

1072

### **Supplementary Figure 4**

1074 Non-linear fit model of [CAR] vs. normalized response for IC50 determination (right) in 468'CT cells  
1075 transduced with inducible scrambled non-targeting shRNAs in the presence or absence of DOX. (n=2)

1076

### **Supplementary Figure 5**

1078 A) Final tumor volumes of VEH (n=6), LGK (n=5), CAR (n=6) and CAR+LGK (n=6) treated mice.  
1079 One way-ANOVA with Holm-Sidak correction for multiple comparisons.

1080 B) Representative brightfield microscopy (20x magnification) of tumor sections labeled with anti-  
1081 human Ki67 (left) and corresponding statistical analysis of the mean frequency of Ki67 positive cells.  
1082 (VEH, CAR, CAR+LGK n=6 and LGK n=4). One-way ANOVA with Holm-Sidak correction for  
1083 multiple comparisons.

1084

1085 (Barplots represent mean + SEM. \*  $p < 0.05$ , \*\*  $p < 0.01$ , \*\*\*  $p < 0.001$ , \*\*\*\*  $p < 0.0001$ , ns= non  
1086 significant)

1087

1088

1089

1090

1091

1092

Figure 1

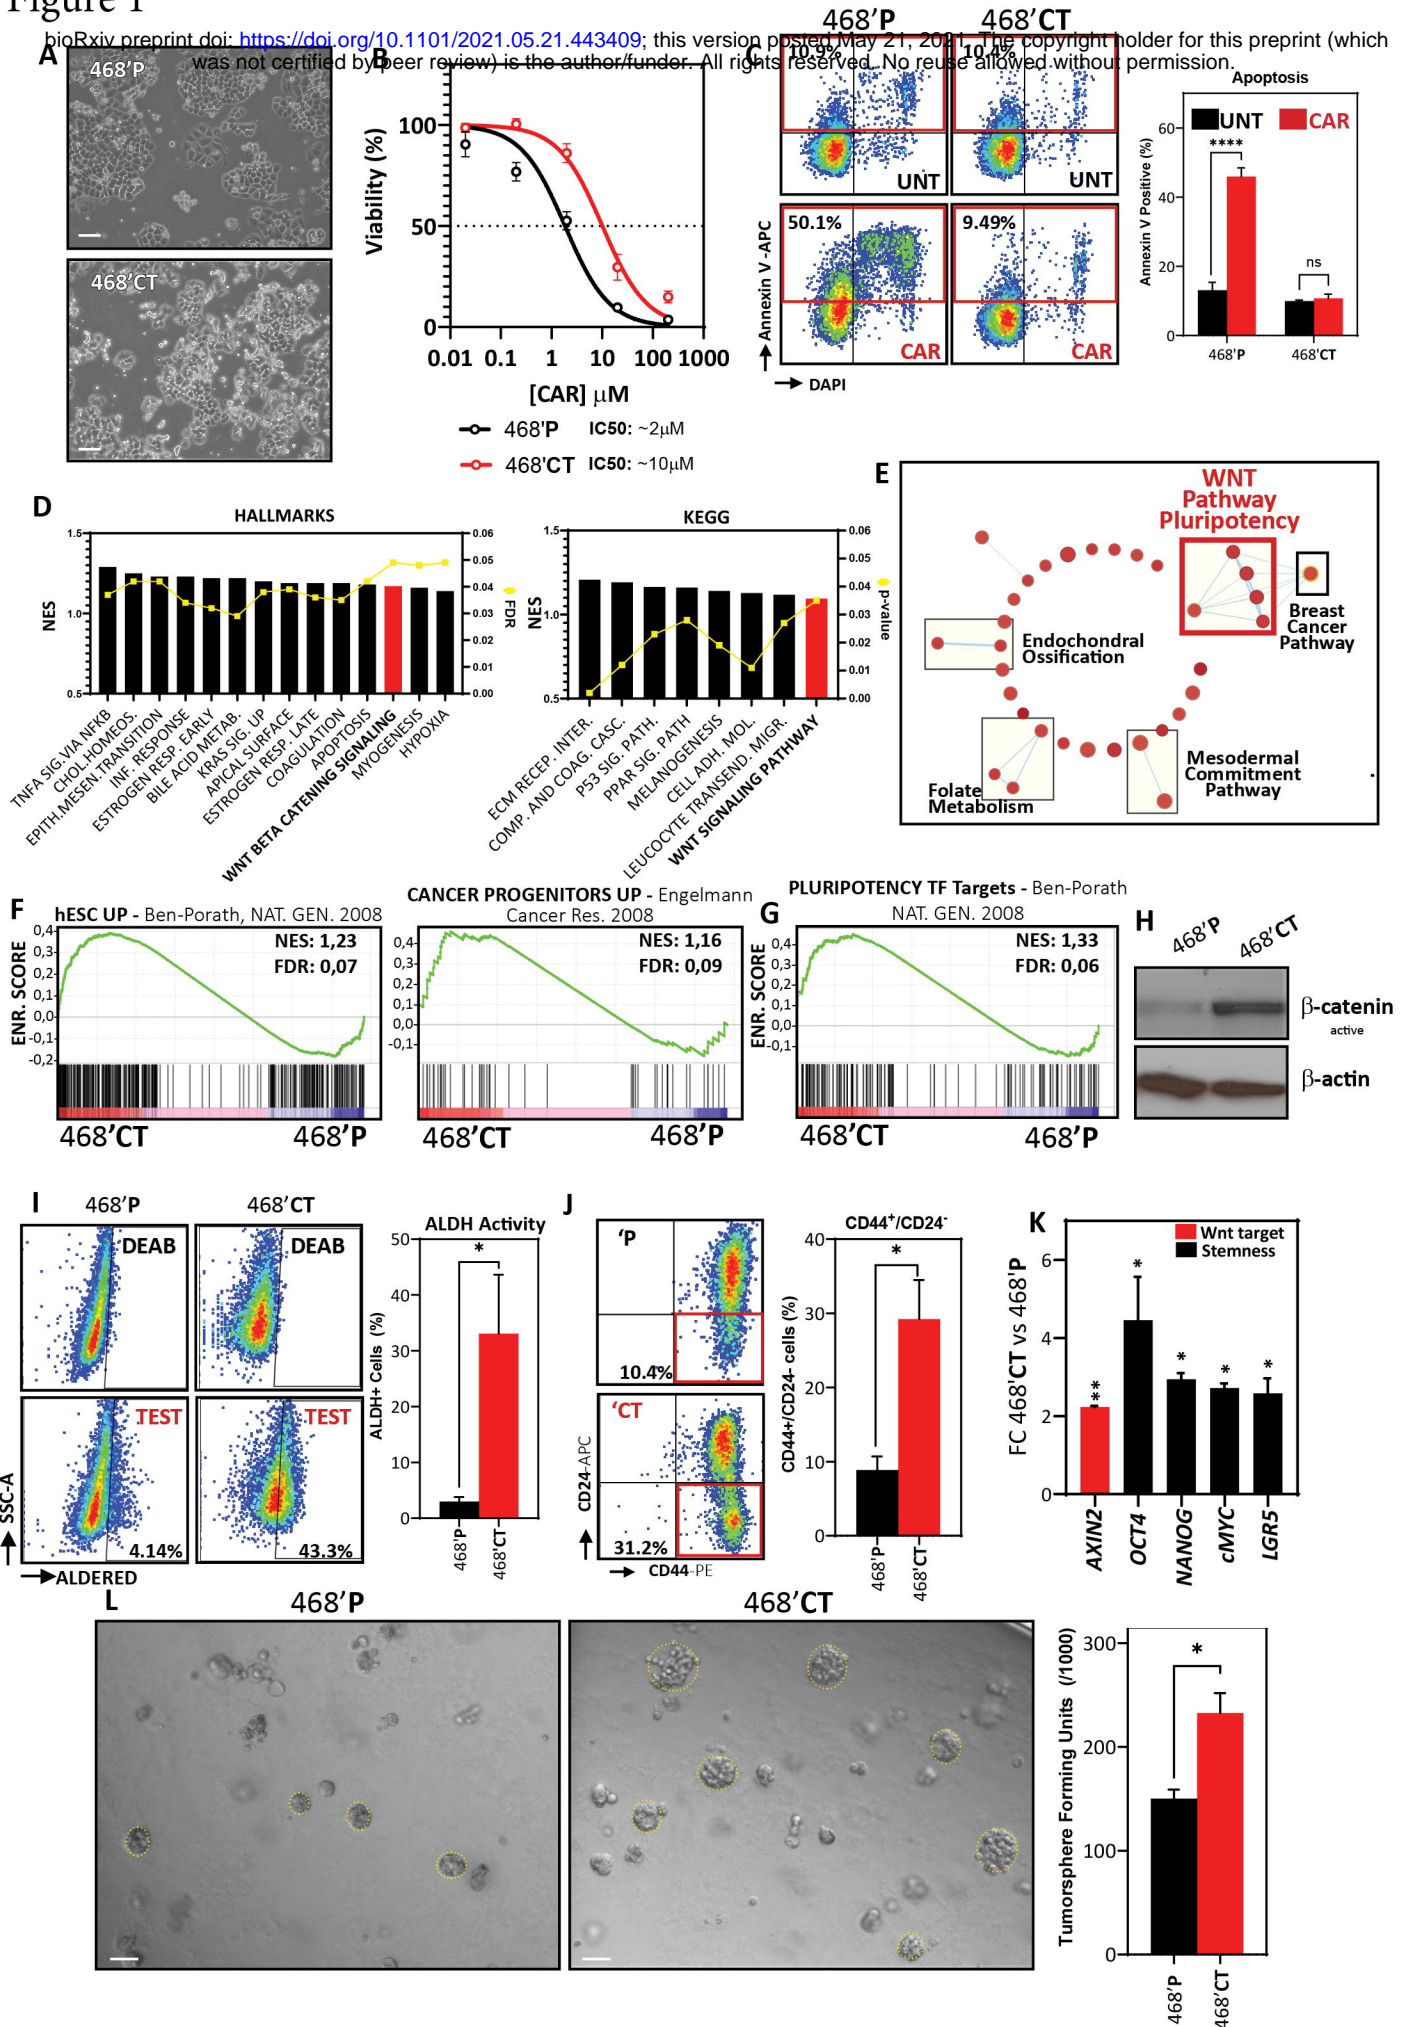

# Figure 2

bioRxiv preprint doi: <https://doi.org/10.1101/2021.05.21.443409>; this version posted May 21, 2021. The copyright holder for this preprint (which was not certified by peer review) is the author/funder. All rights reserved. No reuse allowed without permission.

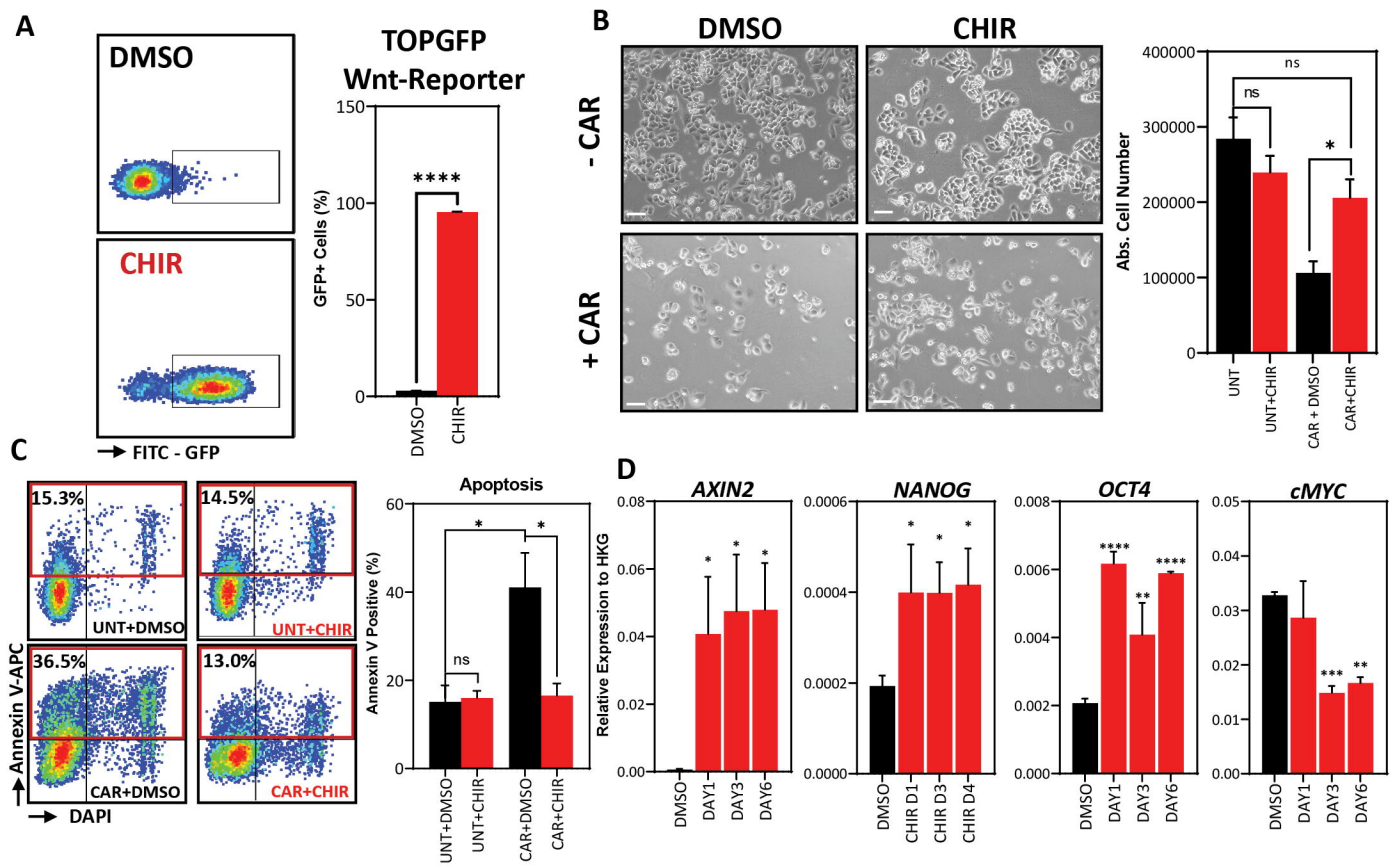

Figure 3

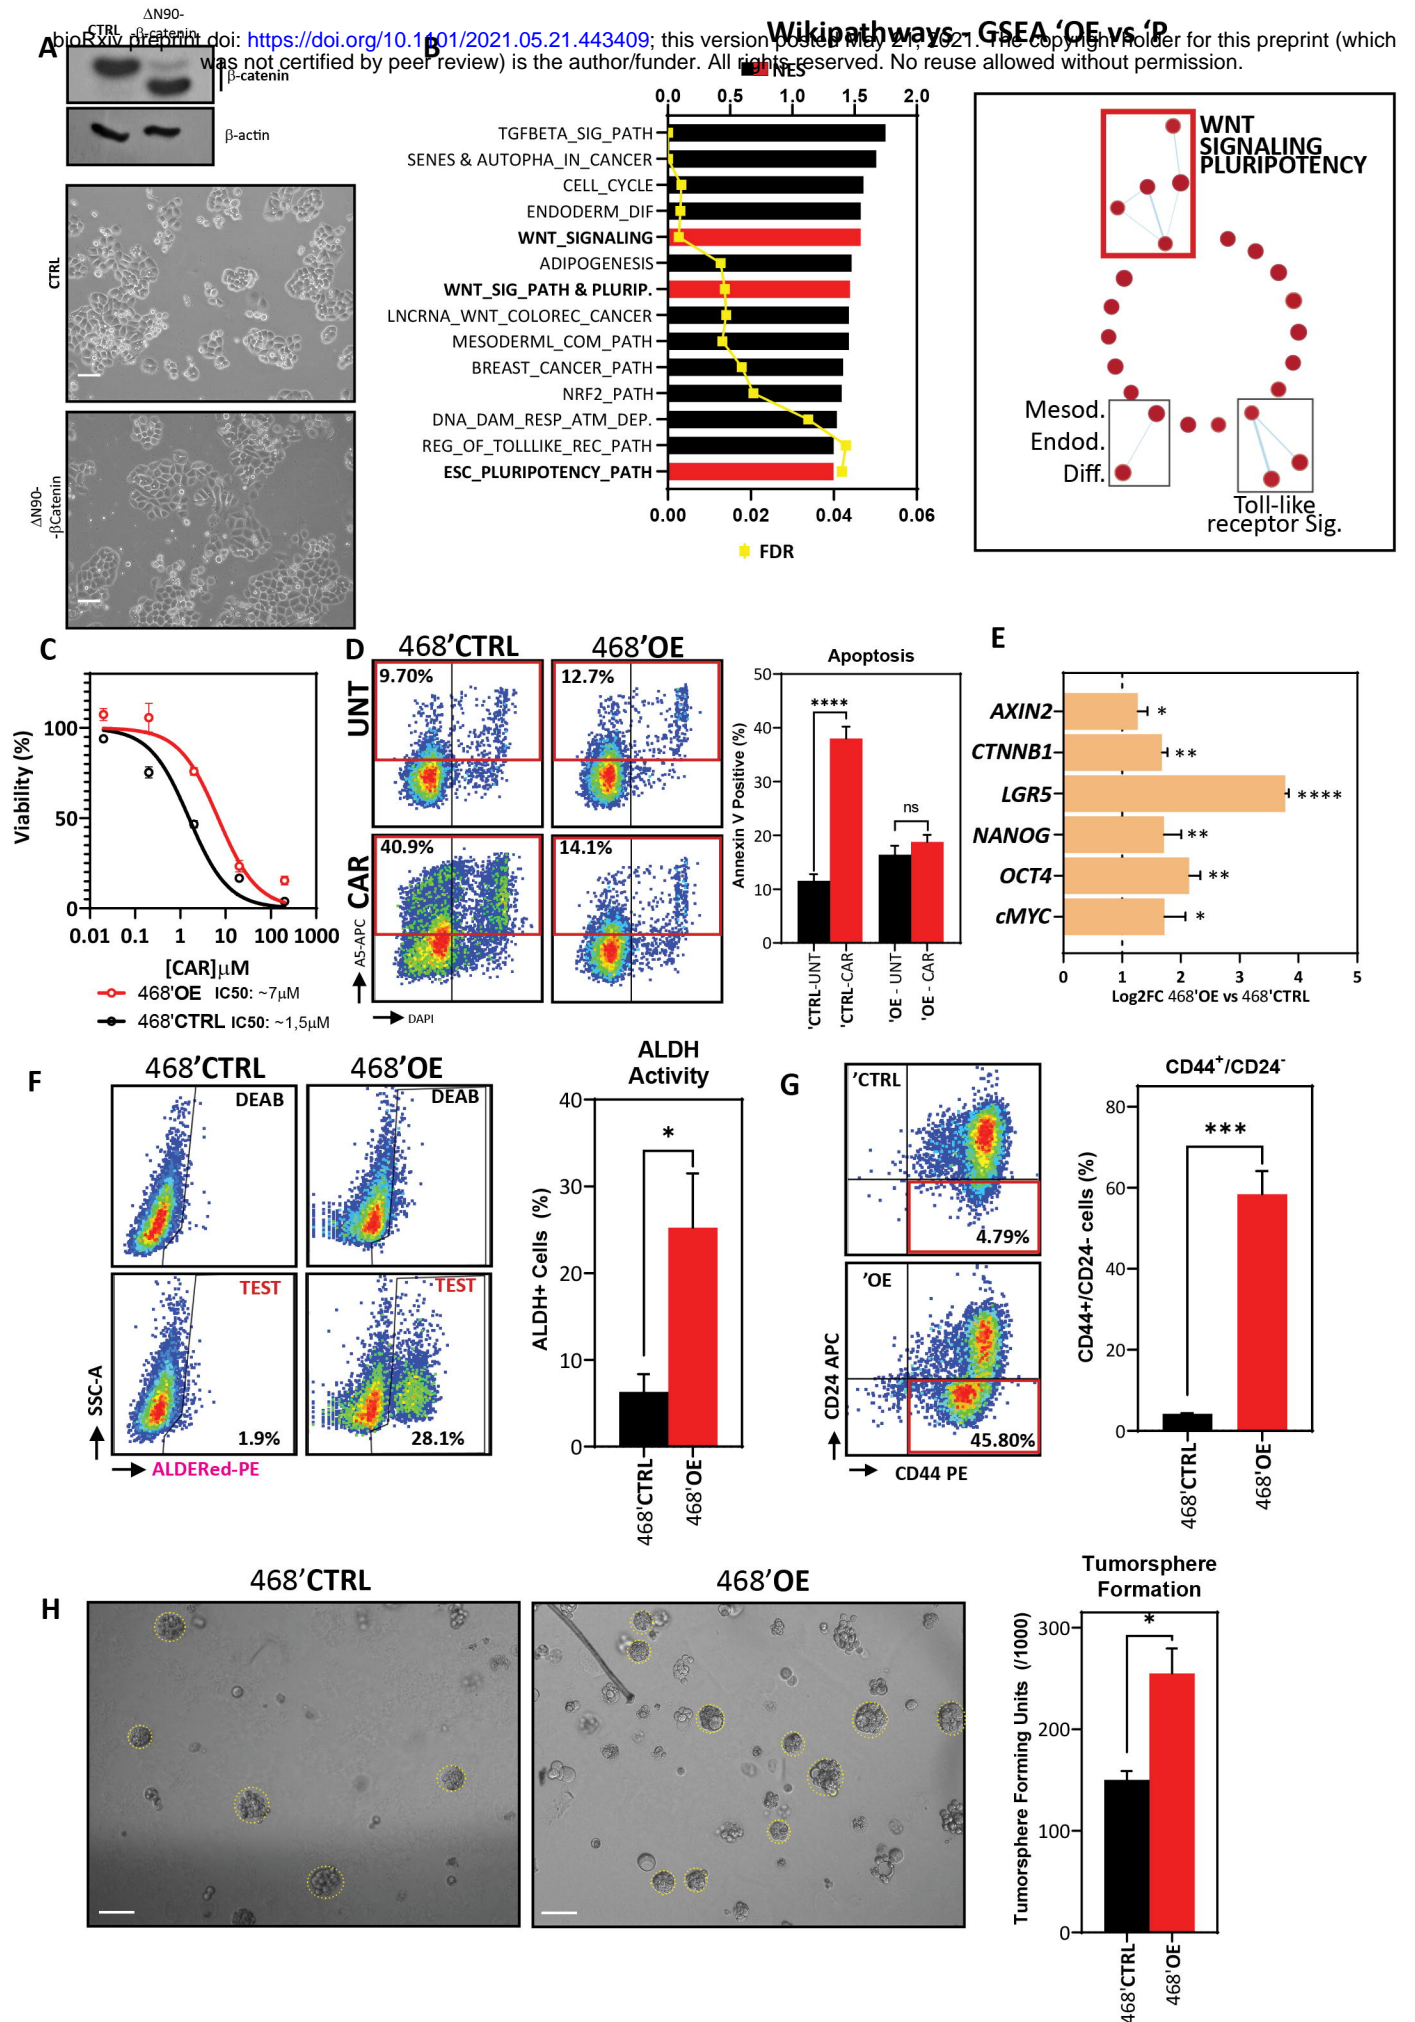

# Figure 4

bioRxiv preprint doi: <https://doi.org/10.1101/2021.05.21.443409>; this version posted May 21, 2021. The copyright holder for this preprint (which was not certified by peer review) is the author/funder. All rights reserved. No reuse allowed without permission.

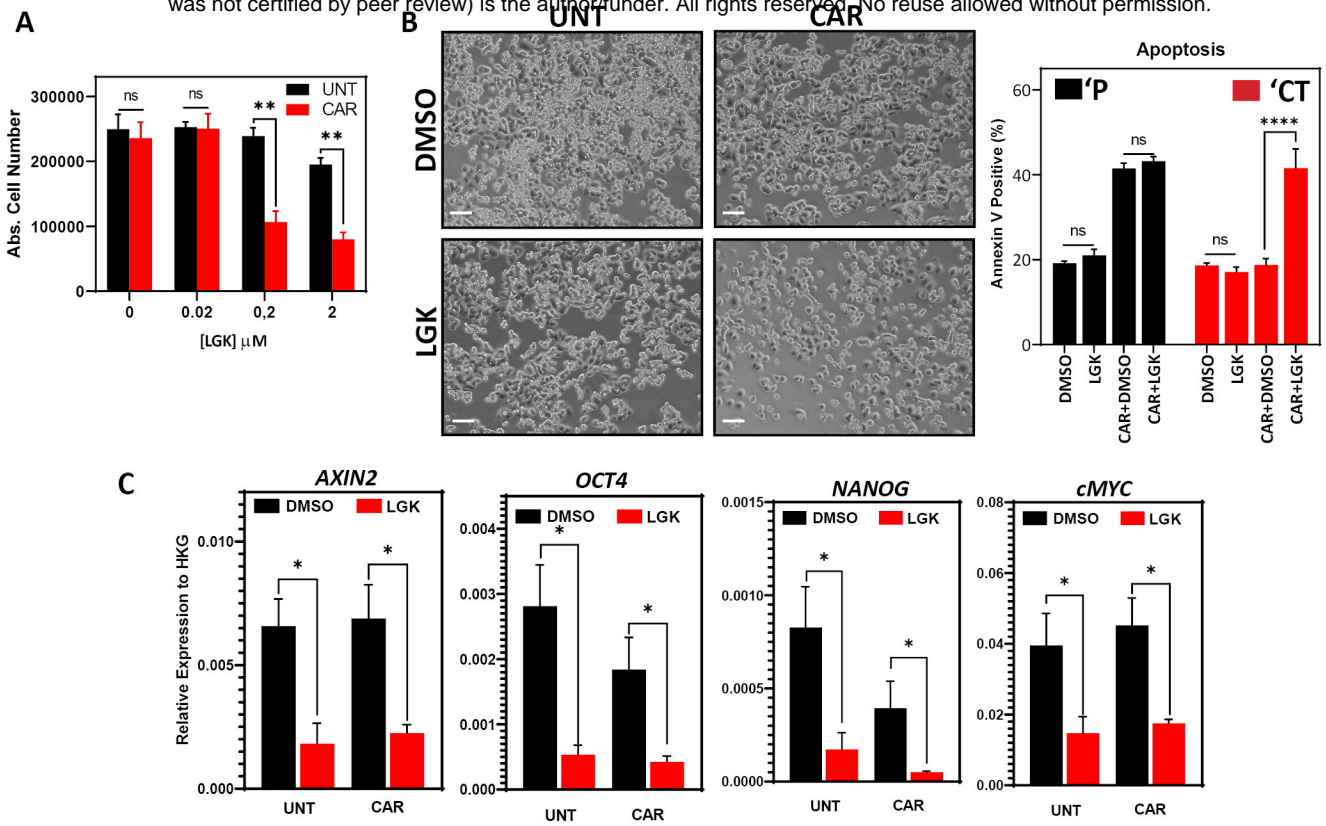

Figure 5

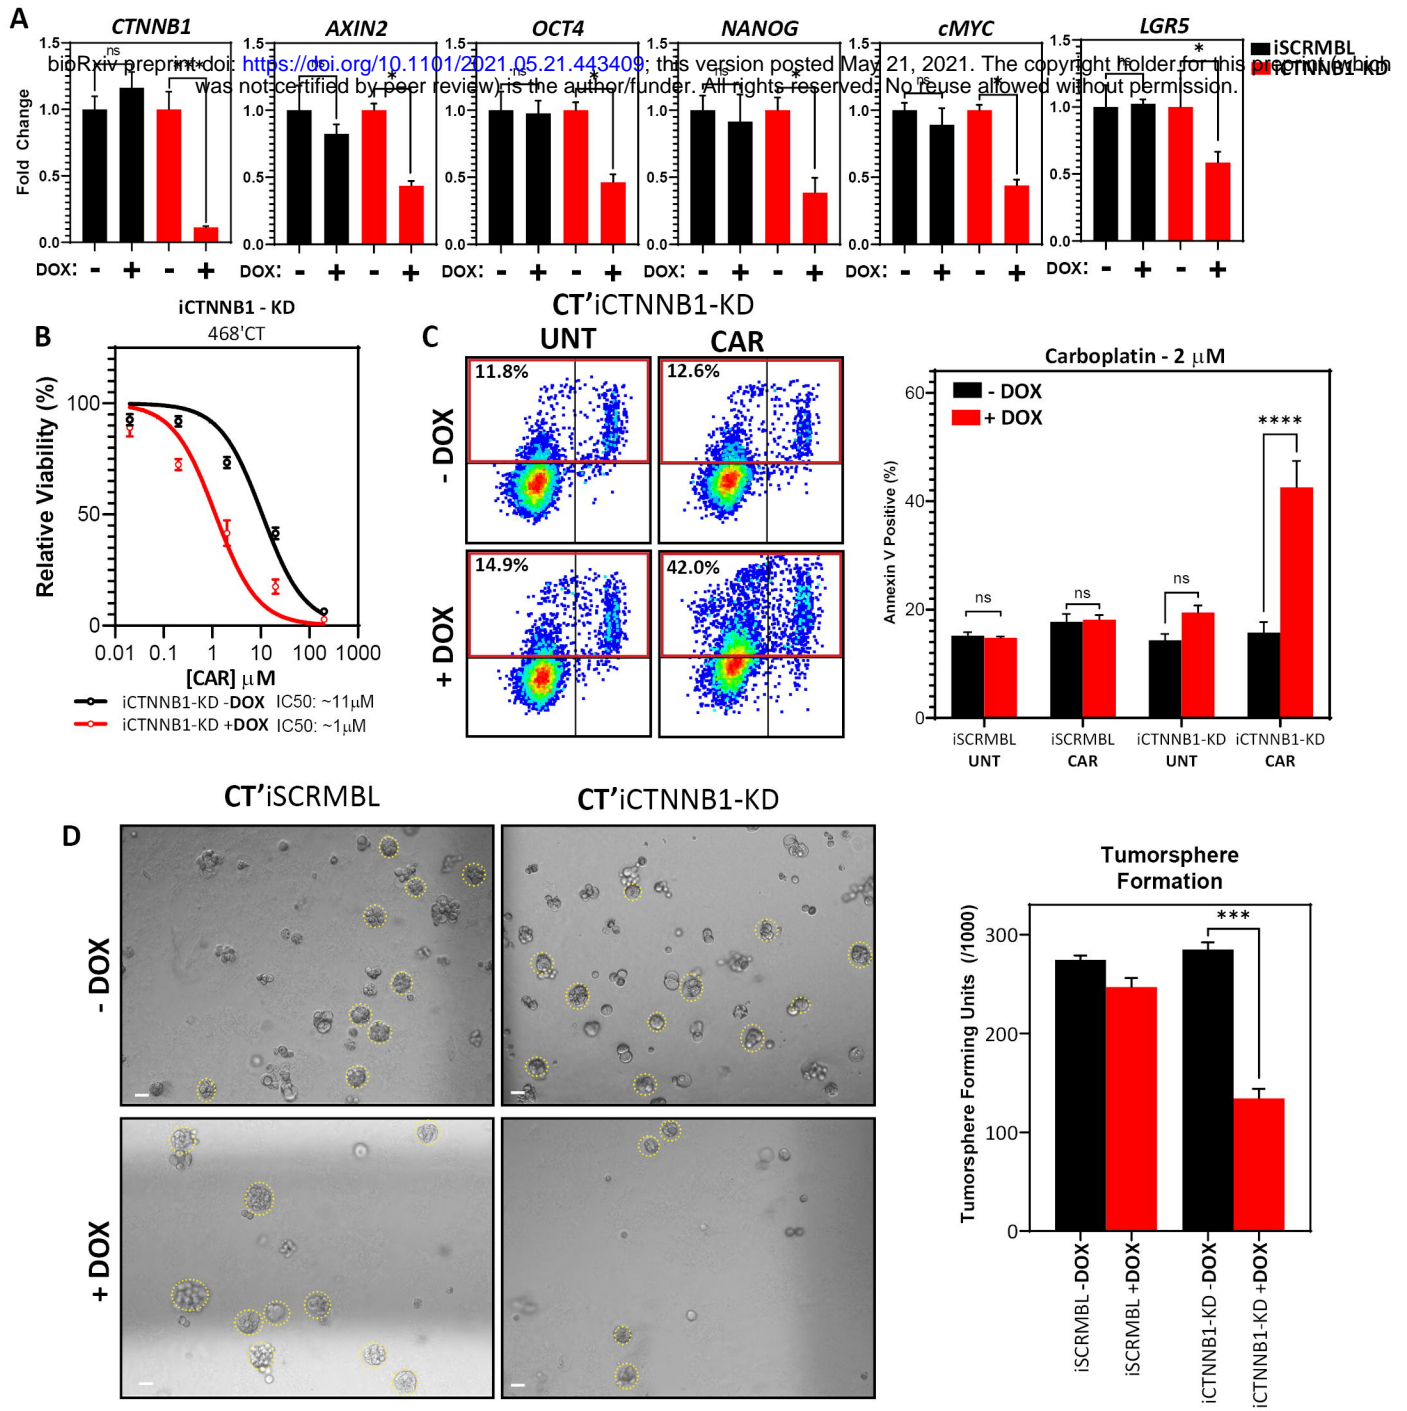



Figure 6

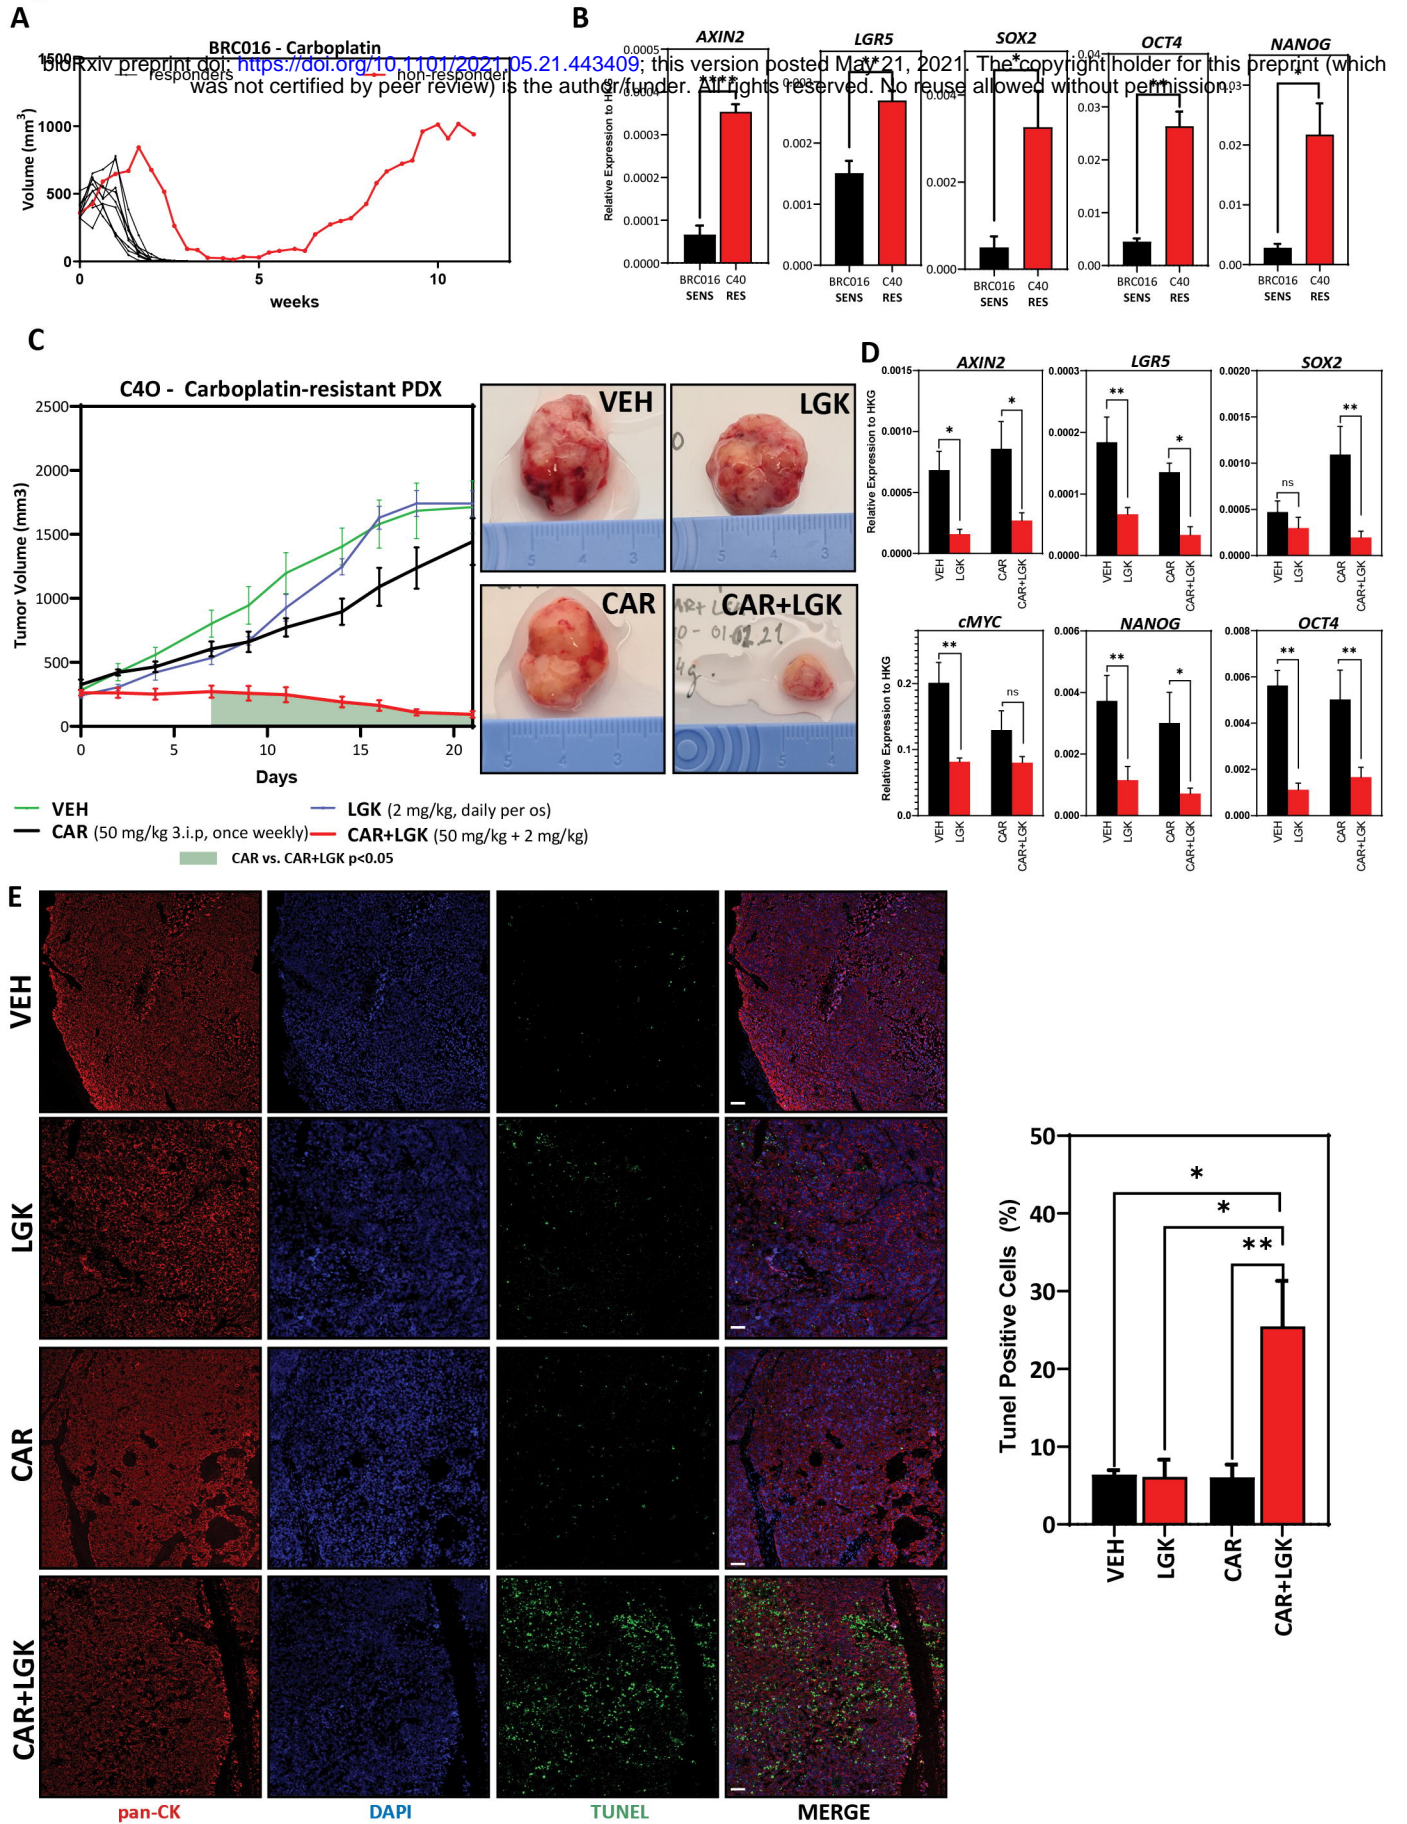

# Figure 7

bioRxiv preprint doi: <https://doi.org/10.1101/2021.05.21.443409>; this version posted May 21, 2021. The copyright holder for this preprint (which was not certified by peer review) is the author/funder. All rights reserved. No reuse allowed without permission.

**A**

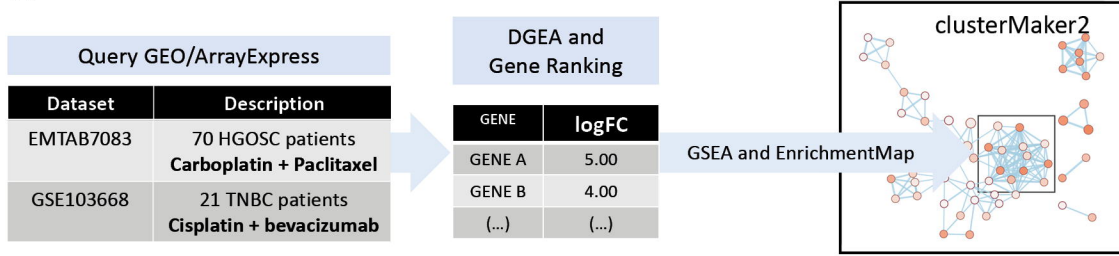

**B**

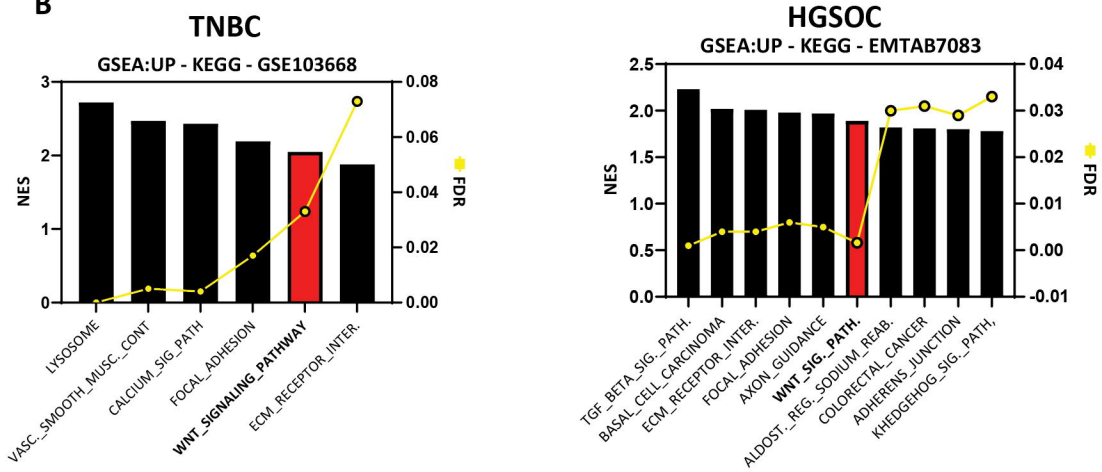

**C**

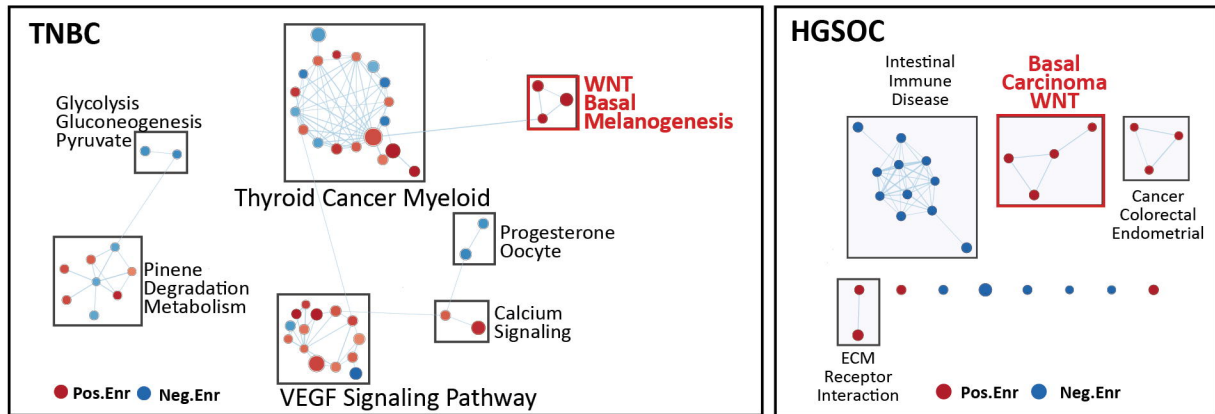

**D**

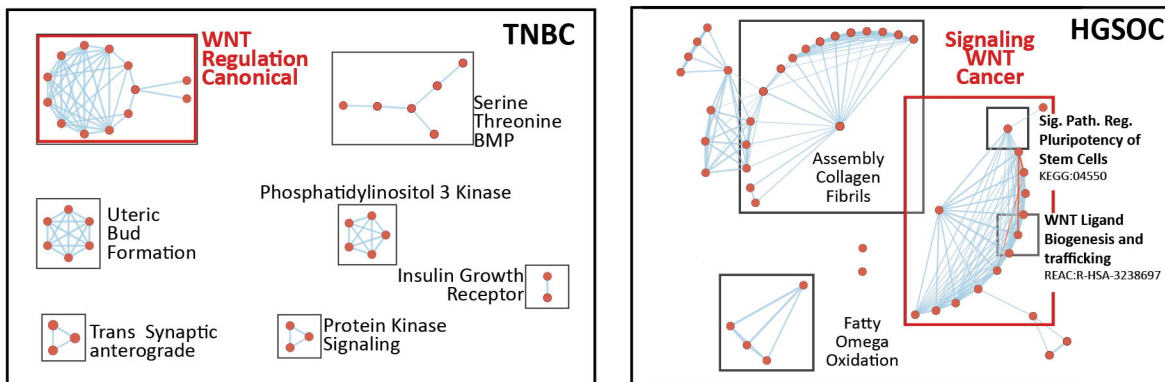

# Supplementary Figure 1

bioRxiv preprint doi: <https://doi.org/10.1101/2021.05.21.443409>; this version posted May 21, 2021. The copyright holder for this preprint (which was not certified by peer review) is the author/funder. All rights reserved. No reuse allowed without permission.

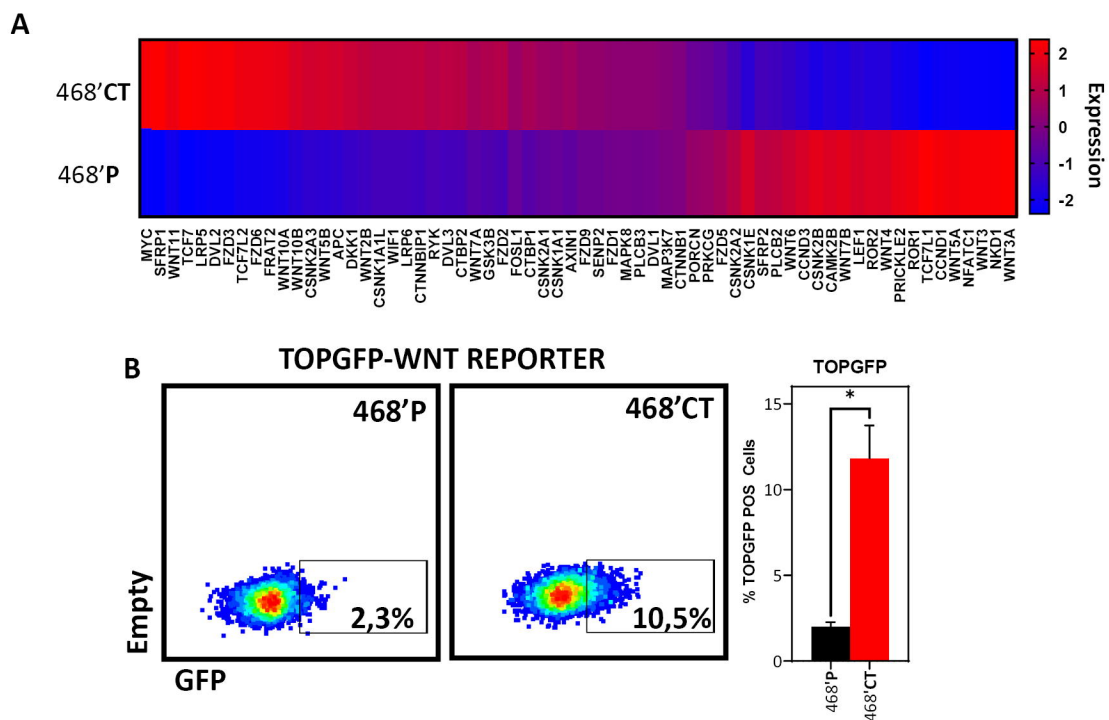

# Supplementary Figure 2

bioRxiv preprint doi: <https://doi.org/10.1101/2021.05.21.443409>; this version posted May 21, 2021. The copyright holder for this preprint (which was not certified by peer review) is the author/funder. All rights reserved. No reuse allowed without permission.

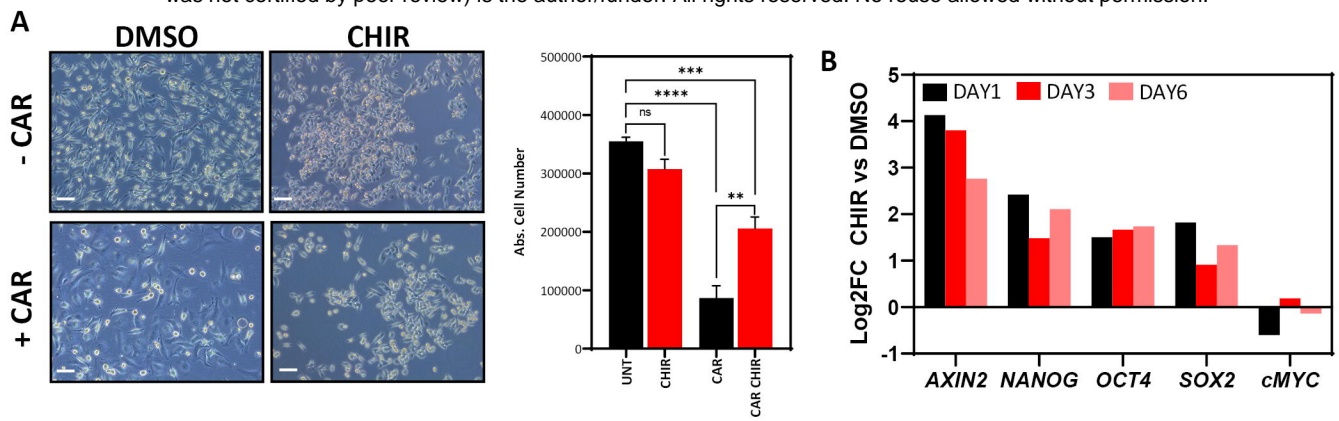

# Supplementary Figure 3

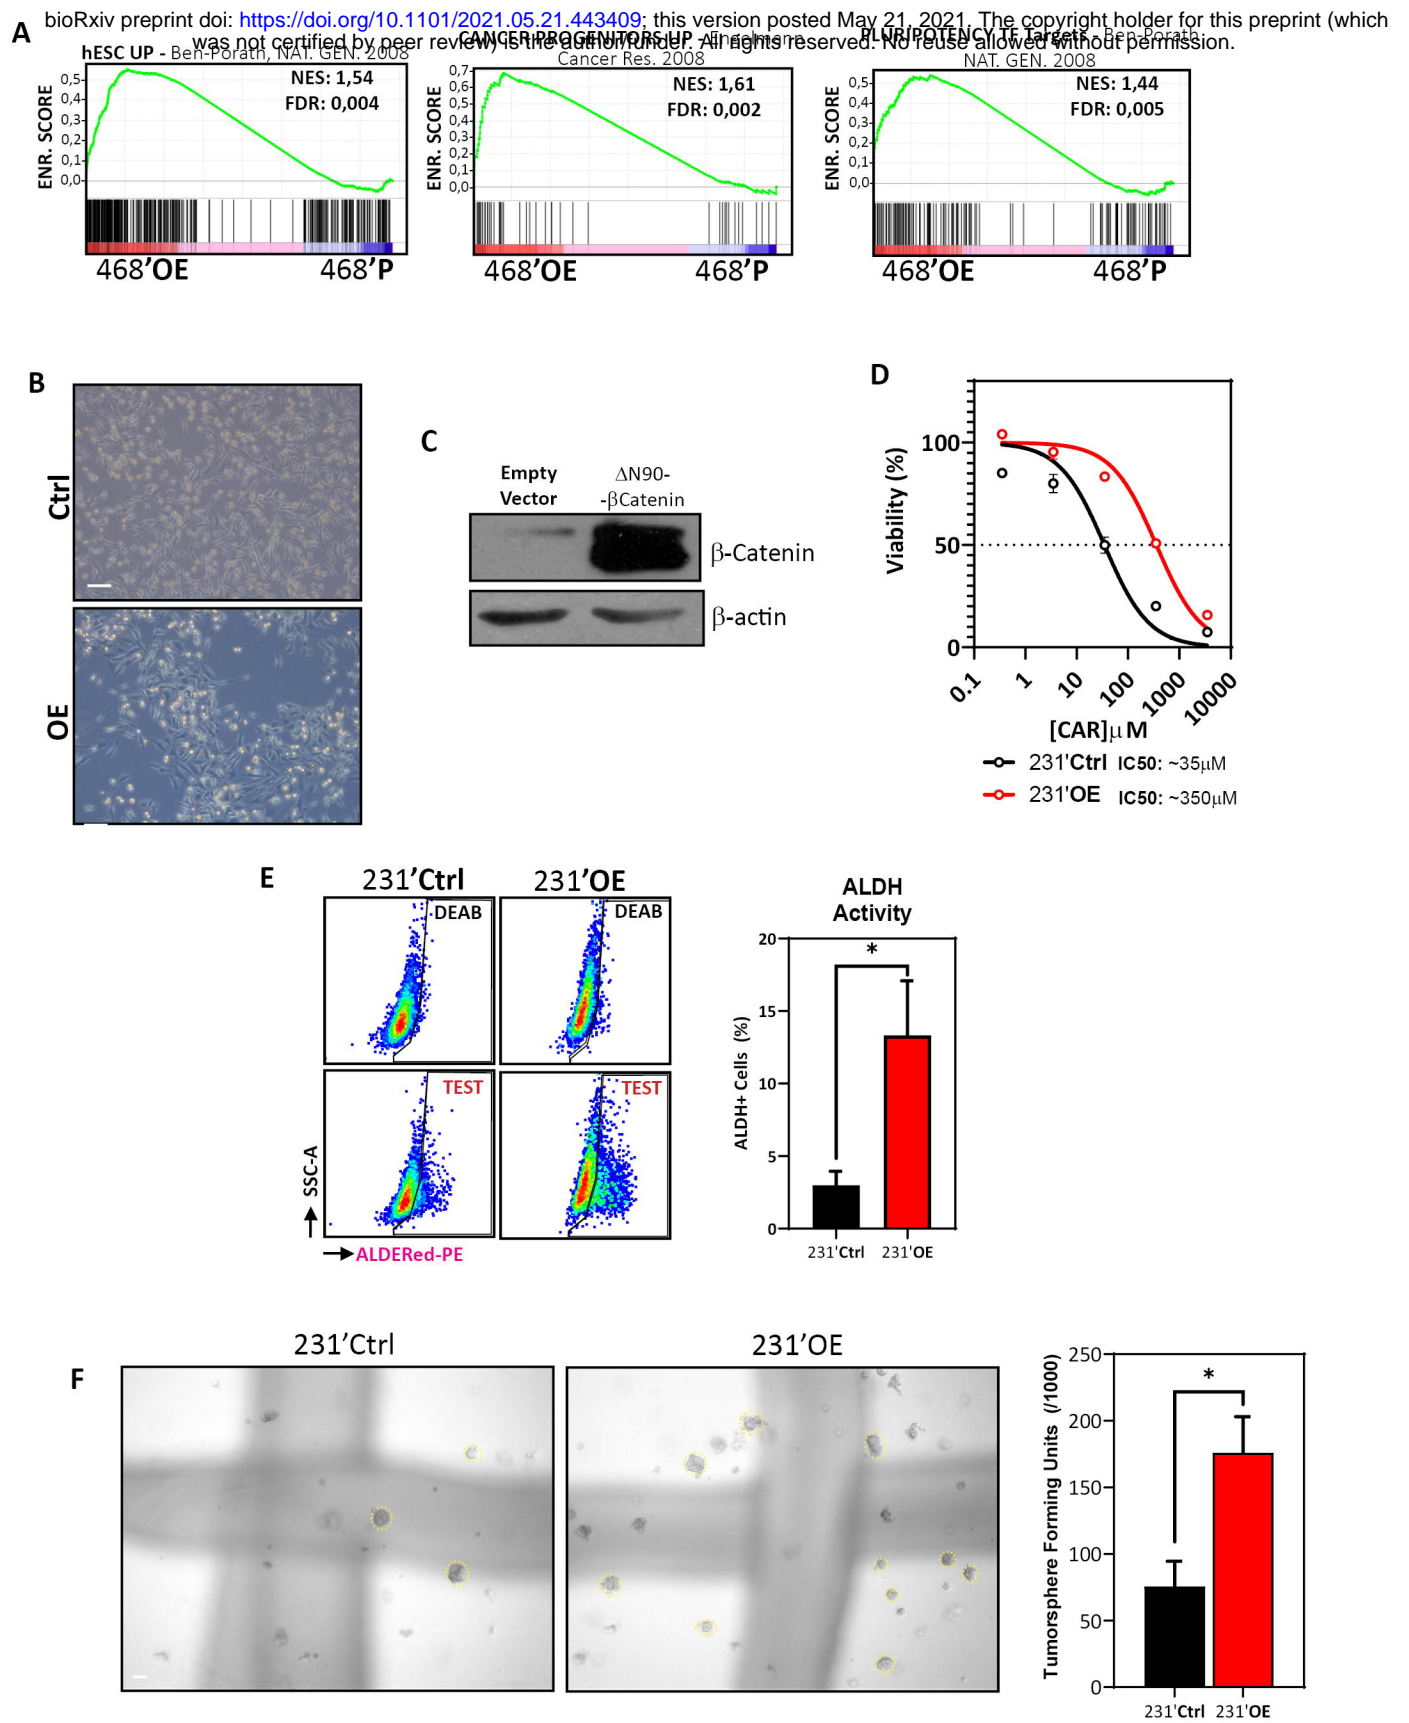

## Supplementary Figure 4

bioRxiv preprint doi: <https://doi.org/10.1101/2021.05.21.443409>; this version posted May 21, 2021. The copyright holder for this preprint (which was not certified by peer review) is the author/funder. All rights reserved. No reuse allowed without permission.

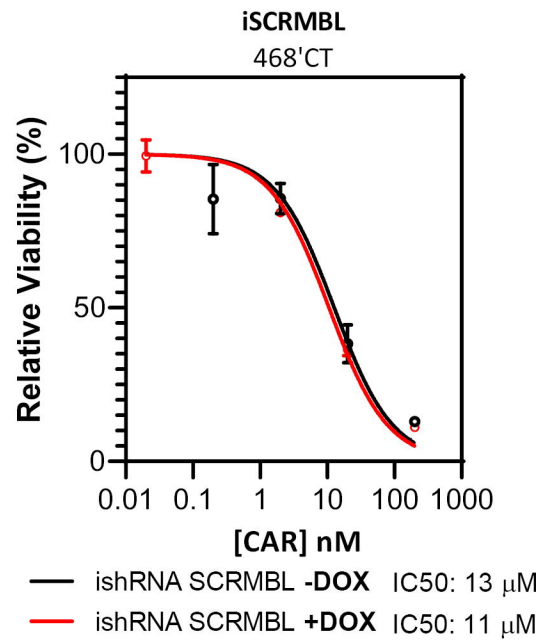

## Supplementary Figure 5

bioRxiv preprint doi: <https://doi.org/10.1101/2021.05.21.443409>; this version posted May 21, 2021. The copyright holder for this preprint (which was not certified by peer review) is the author/funder. All rights reserved. No reuse allowed without permission.

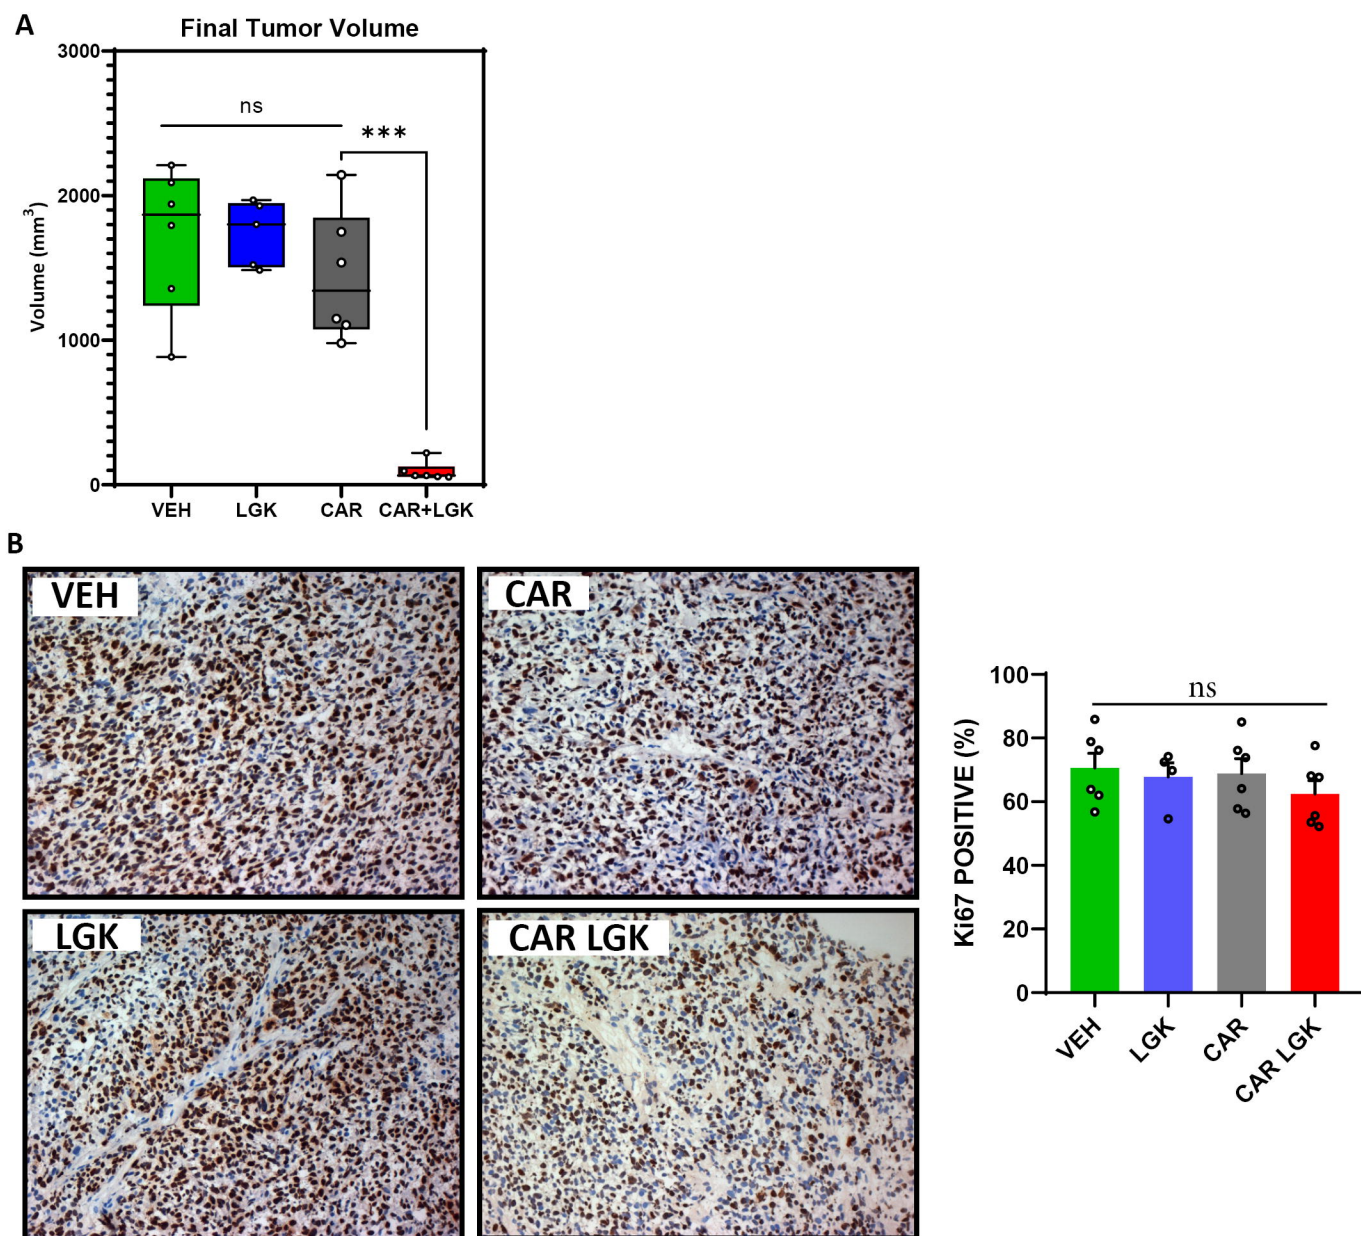

Source: https://www.biorxiv.org/content/10.1101/2021.05.21.443409v1.full.pdf
